# Supplementary material for: Exploring research hotspots and future directions in neural tube defects field by bibliometric and bioinformatics analysis
Source: Front Neurosci. 2024 Apr 8;18:1293400. doi: 10.3389/fnins.2024.1293400 (PMC11033379; doi:10.3389/fnins.2024.1293400)
Supplement: Supplementary file 1 [file Table_1.XLSX]

## Sheet: Sheet1
Publication Type	Authors	Book Editors	Author Full Names	Group Authors	Article Title	Source Title	Book Series Title	Language	Document Type	Author Keywords	Keywords Plus	Abstract	Addresses	Affiliations	Reprint Addresses	Email Addresses	Researcher Ids	ORCIDs	Funding Orgs	Funding Name Preferred	Funding Text	Cited Reference Count	Times Cited, WoS Core	Times Cited, All Databases	180 Day Usage Count	Since 2013 Usage Count	Publisher	Publisher City	Publisher Address	ISSN	eISSN	ISBN	Journal Abbreviation	Journal ISO Abbreviation	Publication Date	Publication Year	Volume	Issue	Part Number	Supplement	Special Issue	Start Page	End Page	Article Number	DOI	DOI Link	Early Access Date	Number of Pages	WoS Categories
J	Marin, S; Ramos, AJ; Cano-Sancho, G; Sanchis, V		Marin, S.; Ramos, A. J.; Cano-Sancho, G.; Sanchis, V.		Mycotoxins: Occurrence, toxicology, and exposure assessment	FOOD AND CHEMICAL TOXICOLOGY		English	Review	Mycotoxins; Food; Occurrence; Toxicology; Exposure	EUKARYOTIC PROTEIN-SYNTHESIS; HEALTH-RISK ASSESSMENT; NEURAL-TUBE DEFECTS; DIETARY EXPOSURE; OCHRATOXIN-A; FUSARIUM MYCOTOXINS; CATALONIA SPAIN; AFLATOXIN B-1; URINARY DEOXYNIVALENOL; ESTROGENIC MYCOTOXIN	Mycotoxins are abiotic hazards produced by certain fungi that can grow on a variety of crops. Consequently, their prevalence in plant raw materials may be relatively high. The concentration of mycotoxins in finished products is usually lower than in raw materials. In this review, occurrence and toxicology of the main mycotoxins are summarised. Furthermore, methodological approaches for exposure a…	[Marin, S.; Ramos, A. J.; Cano-Sancho, G.; Sanchis, V.] Univ Lleida, Agrotecnio Ctr, UTPV XaRTA, Dept Food Technol, Lleida 25198, Spain	Universitat de Lleida	Sanchis, V (通讯作者)，Univ Lleida, Agrotecnio Ctr, UTPV XaRTA, Dept Food Technol, Rovira Roure 191, Lleida 25198, Spain.	vsanchis@tecal.udl.cat	Marin, Sonia/G-1013-2012; sanchis, vicente/B-3752-2011; Marín, Sonia/B-8295-2011; Ramos, Antonio J./B-3934-2011	Marin, Sonia/0000-0002-0714-6155; sanchis, vicente/0000-0001-9889-8098; Marín, Sonia/0000-0002-0714-6155; Ramos, Antonio J./0000-0002-2830-8299; Cano-Sancho, German/0000-0003-4111-4007	Spanish government [AGL2010-22182-C04-04, AGL2011-24862]; Catalonian Food Safety Agency of the 'Generalitat de Catalunya' Health Department; European Union [MYCORED KBBE-2007-2-5-05]	Spanish government(Spanish Government); Catalonian Food Safety Agency of the 'Generalitat de Catalunya' Health Department; European Union(European CommissionSpanish Government)	The authors are grateful to the Spanish government (projects AGL2010-22182-C04-04 and AGL2011-24862), the Catalonian Food Safety Agency of the 'Generalitat de Catalunya' Health Department, and the European Union (MYCORED KBBE-2007-2-5-05 project) for funding.	172	935	995	75	892	PERGAMON-ELSEVIER SCIENCE LTD	OXFORD	THE BOULEVARD, LANGFORD LANE, KIDLINGTON, OXFORD OX5 1GB, ENGLAND	0278-6915	1873-6351		FOOD CHEM TOXICOL	Food Chem. Toxicol.	OCT	2013	60					218	237		10.1016/j.fct.2013.07.047	http://dx.doi.org/10.1016/j.fct.2013.07.047		20	Food Science & Technology; Toxicology
J	Ducker, GS; Rabinowitz, JD		Ducker, Gregory S.; Rabinowitz, Joshua D.		One-Carbon Metabolism in Health and Disease	CELL METABOLISM		English	Review		NOVO THYMIDYLATE BIOSYNTHESIS; GLYCINE N-METHYLTRANSFERASE; GAMMA-GLUTAMATE SYNTHETASE; NEURAL-TUBE DEFECTS; DEHYDROGENASE-METHENYLTETRAHYDROFOLATE CYCLOHYDROLASE; METHYLENETETRAHYDROFOLATE REDUCTASE DEFICIENCY; HOMOCYSTEINE S-METHYLTRANSFERASE; FOLIC-ACID SUPPLEMENTATION; ELECTRON-TRANSPORT CHAIN; CELL LUNG-CANCER	One-carbon (1C) metabolism, mediated by the folate cofactor, supports multiple physiological processes. These include biosynthesis (purines and thymidine), amino acid homeostasis (glycine, serine, and methionine), epigenetic maintenance, and redox defense. Both within eukaryotic cells and across organs, 1C metabolic reactions are compartmentalized. Here we review the fundamentals of mammalian 1C …	[Ducker, Gregory S.; Rabinowitz, Joshua D.] Princeton Univ, Lewis Sigler Inst Integrat Genom, Princeton, NJ 08544 USA; [Ducker, Gregory S.; Rabinowitz, Joshua D.] Princeton Univ, Dept Chem, Princeton, NJ 08544 USA	Princeton University; Princeton University	Rabinowitz, JD (通讯作者)，Princeton Univ, Lewis Sigler Inst Integrat Genom, Princeton, NJ 08544 USA.;Rabinowitz, JD (通讯作者)，Princeton Univ, Dept Chem, Princeton, NJ 08544 USA.	joshr@princeton.edu	Rabinowitz, Joshua/GPP-4019-2022	Rabinowitz, Joshua/0000-0002-1247-4727; Ducker, Gregory/0000-0002-8651-6846	American Cancer Society [PF-15-190-01-TBE]; NIH [R01CA163591, P30DK019525]; Stand Up to Cancer	American Cancer Society(American Cancer Society); NIH(United States Department of Health & Human ServicesNational Institutes of Health (NIH) - USA); Stand Up to Cancer	G.S.D. is supported by a postdoctoral fellowship from the American Cancer Society (PF-15-190-01-TBE). J.D.R. is supported by NIH grants R01CA163591 and P30DK019525 and Stand Up to Cancer. We thank Li Chen, Jonathan Ghergurovich, and all members of the J.D.R. lab for helpful discussions. J.D.R. is a founder and SAB member of Raze Therapeutics, which targets 1C metabolism.	154	900	915	11	206	CELL PRESS	CAMBRIDGE	600 TECHNOLOGY SQUARE, 5TH FLOOR, CAMBRIDGE, MA 02139 USA	1550-4131	1932-7420		CELL METAB	Cell Metab.	JAN 10	2017	25	1				27	42		10.1016/j.cmet.2016.08.009	http://dx.doi.org/10.1016/j.cmet.2016.08.009		16	Cell Biology; Endocrinology & Metabolism
J	Bailey, RL; West, KP; Black, RE		Bailey, Regan L.; West, Keith P., Jr.; Black, Robert E.		The Epidemiology of Global Micronutrient Deficiencies	ANNALS OF NUTRITION AND METABOLISM		English	Article	Epidemiology; Micronutrient deficiencies; Vitamins; Minerals	NEURAL-TUBE DEFECTS; IODINE-DEFICIENCY; FOOD FORTIFICATION; NUTRITION STATUS; THYROID-FUNCTION; PREGNANT-WOMEN; CHILDREN; IRON; GROWTH; SUPPLEMENTATION	Micronutrients are essential to sustain life and for optimal physiological function. Widespread global micronutrient deficiencies (MNDs) exist, with pregnant women and their children under 5 years at the highest risk. Iron, iodine, folate, vitamin A, and zinc deficiencies are the most widespread MNDs, and all these MNDs are common contributors to poor growth, intellectual impairments, perinatal c…	[Bailey, Regan L.] NIH, Off Dietary Supplements, Bethesda, MD 20892 USA; [Bailey, Regan L.; West, Keith P., Jr.; Black, Robert E.] Johns Hopkins Univ, Bloomberg Sch Publ Hlth, Dept Int Nutr, Baltimore, MD USA	National Institutes of Health (NIH) - USA; Johns Hopkins University; Johns Hopkins Bloomberg School of Public Health	Bailey, RL (通讯作者)，NIH, Off Dietary Supplements, 6100 Execut Blvd,Suite 3B01, Bethesda, MD 20892 USA.	baileyr@mail.nih.gov		Bailey, Regan/0000-0003-0181-6223				90	645	668	15	198	KARGER	BASEL	ALLSCHWILERSTRASSE 10, CH-4009 BASEL, SWITZERLAND	0250-6807	1421-9697		ANN NUTR METAB	Ann. Nutr. Metab.		2015	66			2		22	33		10.1159/000371618	http://dx.doi.org/10.1159/000371618		12	Endocrinology & Metabolism; Nutrition & Dietetics
J	Ward, MH; Jones, RR; Brender, JD; de Kok, TM; Weyer, PJ; Nolan, BT; Villanueva, CM; van Breda, SG		Ward, Mary H.; Jones, Rena R.; Brender, Jean D.; de Kok, Theo M.; Weyer, Peter J.; Nolan, Bernard T.; Villanueva, Cristina M.; van Breda, Simone G.		Drinking Water Nitrate and Human Health: An Updated Review	INTERNATIONAL JOURNAL OF ENVIRONMENTAL RESEARCH AND PUBLIC HEALTH		English	Review	drinking water; nitrate; cancer; adverse reproductive outcomes; methemoglobinemia; thyroid disease; endogenous nitrosation; N-nitroso compounds	N-NITROSO COMPOUNDS; DISINFECTION BY-PRODUCTS; NITROSATABLE DRUG EXPOSURE; COLORECTAL-CANCER RISK; NITRIC-OXIDE SYNTHASE; NEURAL-TUBE DEFECTS; BIRTH-DEFECTS; ENDOGENOUS FORMATION; REACTIVE NITROGEN; INGESTED NITRATE	Nitrate levels in our water resources have increased in many areas of the world largely due to applications of inorganic fertilizer and animal manure in agricultural areas. The regulatory limit for nitrate in public drinking water supplies was set to protect against infant methemoglobinemia, but other health effects were not considered. Risk of specific cancers and birth defects may be increased …	[Ward, Mary H.; Jones, Rena R.] NCI, Occupat & Environm Epidemiol Branch, Div Canc Epidemiol & Genet, 9609 Med Ctr Dr,Room 6E138, Rockville, MD 20850 USA; [Brender, Jean D.] Texas A&M Univ, Sch Publ Hlth, Dept Epidemiol & Biostat, College Stn, TX 77843 USA; [de Kok, Theo M.; van Breda, Simone G.] Maastricht Univ, Med Ctr, GROW Sch Oncol & Dev Biol, Dept Toxicogen, POB 616, NL-6200 MD Maastricht, …	National Institutes of Health (NIH) - USA; NIH National Cancer Institute (NCI); Texas A&M University System; Texas A&M University College Station; Texas A&M Health Science Center; Maastricht University; University of Iowa; United States Department of the Interior; United States Geological Survey; ISGlobal; Institut Hospital del Mar d'Investigacions Mediques (IMIM); Pompeu Fabra University; CIBER …	Ward, MH (通讯作者)，NCI, Occupat & Environm Epidemiol Branch, Div Canc Epidemiol & Genet, 9609 Med Ctr Dr,Room 6E138, Rockville, MD 20850 USA.	wardm@mail.nih.gov; rena.jones@nih.gov; jdbrender@sph.tamhsc.edu; t.dekok@maastrichtuniversity.nl; peter-weyer@uiowa.edu; btnolan@usgs.gov; cvillanueva@isiglobal.org; s.vanbreda@maastrichtuniversity.nl	Villanueva, Cristina M/N-1942-2014	Villanueva, Cristina M/0000-0002-0783-1259; Jones, Rena/0000-0003-1294-1679	Intramural Research Program of the National Cancer Institute, Division of Cancer Epidemiology and Genetics, Occupational and Environmental Epidemiology Branch; European Commission in the context of the integrated project PHYTOME under the Seventh Framework Programme for Research and Technology Development of the European Commission (EU-FP7) [315683]	Intramural Research Program of the National Cancer Institute, Division of Cancer Epidemiology and Genetics, Occupational and Environmental Epidemiology Branch; European Commission in the context of the integrated project PHYTOME under the Seventh Framework Programme for Research and Technology Development of the European Commission (EU-FP7)	This work was partly supported by the Intramural Research Program of the National Cancer Institute, Division of Cancer Epidemiology and Genetics, Occupational and Environmental Epidemiology Branch. Two authors (TMdK, SvB) acknowledge financial support from the European Commission in the context of the integrated project PHYTOME financed under the Seventh Framework Programme for Research and Techn…	171	527	537	33	219	MDPI	BASEL	ST ALBAN-ANLAGE 66, CH-4052 BASEL, SWITZERLAND		1660-4601		INT J ENV RES PUB HE	Int. J. Environ. Res. Public Health	JUL	2018	15	7						1557	10.3390/ijerph15071557	http://dx.doi.org/10.3390/ijerph15071557		31	Environmental Sciences; Public, Environmental & Occupational Health
J	Silva, NA; Sousa, N; Reis, RL; Salgado, AJ		Silva, Nuno A.; Sousa, Nuno; Reis, Rui L.; Salgado, Antonio J.		From basics to clinical: A comprehensive review on spinal cord injury	PROGRESS IN NEUROBIOLOGY		English	Review	Spinal cord injury; Pathophysiology; Cell therapy; Molecular therapy; Combinatorial therapies; Clinical trials	OLFACTORY ENSHEATHING CELLS; MYELIN-ASSOCIATED GLYCOPROTEIN; MARROW STROMAL CELLS; PLURIPOTENT STEM-CELLS; CHONDROITIN SULFATE PROTEOGLYCANS; PROMOTES FUNCTIONAL RECOVERY; NERVE GROWTH-FACTOR; NOGO-66 RECEPTOR ANTAGONIST; CORTICOSPINAL TRACT LESIONS; CILIARY NEUROTROPHIC FACTOR	Spinal cord injury (SCI) is a devastating neurological disorder that affects thousands of individuals each year. Over the past decades an enormous progress has been made in our understanding of the molecular and cellular events generated by SCI, providing insights into crucial mechanisms that contribute to tissue damage and regenerative failure of injured neurons. Current treatment options for SC…	[Silva, Nuno A.; Sousa, Nuno; Salgado, Antonio J.] Univ Minho, Sch Hlth Sci, Life & Hlth Sci Res Inst ICVS, P-4710057 Braga, Portugal; [Silva, Nuno A.; Sousa, Nuno; Reis, Rui L.; Salgado, Antonio J.] ICVS 3Bs PT Govt Associate Lab, Braga, Portugal; [Reis, Rui L.] Univ Minho, Headquarters European Inst Excellence Tissue Engn, Res Grp Biomat Biodegradables & Biomimet 3Bs, P-4806909 Caldas Das Taipa…	Universidade do Minho; Universidade do Minho	Salgado, AJ (通讯作者)，Univ Minho, Sch Hlth Sci, Life & Hlth Sci Res Inst ICVS, Campus Gualtar, P-4710057 Braga, Portugal.	asalgado@ecsaude.uminho.pt	Sousa, Nuno JC/N-9137-2017; Sousa, Nuno/C-2782-2009; Silva, Nuno A./K-4077-2012; Salgado, Antonio J/T-6500-2018; Reis, Rui L./A-8938-2008	Sousa, Nuno JC/0000-0002-8755-5126; Silva, Nuno A./0000-0002-1061-1716; Salgado, Antonio J/0000-0003-3806-9823; Reis, Rui L./0000-0002-4295-6129; UMinho, 3B's Research Group/0000-0002-5195-3456	Portuguese Foundation for Science and Technology [PTDC/SAU-BMA/114059/2009]; Foundation Calouste de Gulbenkian; Gulbenkian Program to Support Research in the Life Sciences; Programa Operacional Regional do Norte (ON.2-0 Novo Norte); ao abrigo do Quadro de Referencia Estrategico Nacional (QREN); atraves do Fundo Europeu de Desenvolvimento Regional (FEDER); [SFRH/BD/40684/2007]; Fundação para a Ciê…	Portuguese Foundation for Science and Technology(Fundacao para a Ciencia e a Tecnologia (FCT)); Foundation Calouste de Gulbenkian; Gulbenkian Program to Support Research in the Life Sciences; Programa Operacional Regional do Norte (ON.2-0 Novo Norte); ao abrigo do Quadro de Referencia Estrategico Nacional (QREN); atraves do Fundo Europeu de Desenvolvimento Regional (FEDER); ; Fundação para a Ciên…	The authors would like to acknowledge the Portuguese Foundation for Science and Technology (grant no. PTDC/SAU-BMA/114059/2009; pre-doctoral fellowship to Nuno Silva - SFRH/BD/40684/2007); the Foundation Calouste de Gulbenkian for funds attributed to A.J. Salgado under the scope of the Gulbenkian Program to Support Research in the Life Sciences; co-funded by Programa Operacional Regional do Norte…	533	517	556	15	293	PERGAMON-ELSEVIER SCIENCE LTD	OXFORD	THE BOULEVARD, LANGFORD LANE, KIDLINGTON, OXFORD OX5 1GB, ENGLAND	0301-0082	1873-5118		PROG NEUROBIOL	Prog. Neurobiol.	MAR	2014	114					25	57		10.1016/j.pneurobio.2013.11.002	http://dx.doi.org/10.1016/j.pneurobio.2013.11.002		33	Neurosciences
J	Marchi, J; Berg, M; Dencker, A; Olander, EK; Begley, C		Marchi, J.; Berg, M.; Dencker, A.; Olander, E. K.; Begley, C.		Risks associated with obesity in pregnancy, for the mother and baby: a systematic review of reviews	OBESITY REVIEWS		English	Review	Caesarean section; maternal obesity; mental health; outcomes	BODY-MASS INDEX; NEURAL-TUBE DEFECTS; GESTATIONAL DIABETES-MELLITUS; OF-THE-LITERATURE; MATERNAL OBESITY; WEIGHT-GAIN; PREPREGNANCY BMI; BEHAVIOR-CHANGE; PRETERM BIRTH; UNITED-STATES	Maternal obesity is linked with adverse outcomes for mothers and babies. To get an overview of risks related to obesity in pregnant women, a systematic review of reviews was conducted. For inclusion, reviews had to compare pregnant women of healthy weight with women with obesity, and measure a health outcome for mother and/or baby. Authors conducted full-text screening, quality assurance using th…	[Marchi, J.; Begley, C.] Trinity Coll Dublin, Sch Nursing & Midwifery, Dublin 2, Ireland; [Berg, M.; Dencker, A.; Begley, C.] Univ Gothenburg, Inst Hlth & Care Sci, Sahlgrenska Acad, Gothenburg, Sweden; [Berg, M.; Dencker, A.] Univ Gothenburg, Ctr Person Ctr Care GPCC, Gothenburg, Sweden; [Olander, E. K.] City Univ London, Ctr Maternal & Child Hlth Res, London EC1V 0HB, England	Trinity College Dublin; University of Gothenburg; University of Gothenburg; City University London	Marchi, J (通讯作者)，Trinity Coll Dublin, Sch Nursing & Midwifery, 24 DOlier St, Dublin 2, Ireland.	jmarchi@tcd.ie		Olander, Ellinor/0000-0001-7792-9895	University of Gothenburg Centre for Person-Centred Care (GPCC)	University of Gothenburg Centre for Person-Centred Care (GPCC)	This study was supported by the University of Gothenburg Centre for Person-Centred Care (GPCC).	91	480	496	8	140	WILEY	HOBOKEN	111 RIVER ST, HOBOKEN 07030-5774, NJ USA	1467-7881	1467-789X		OBES REV	Obes. Rev.	AUG	2015	16	8				621	638		10.1111/obr.12288	http://dx.doi.org/10.1111/obr.12288		18	Endocrinology & Metabolism
J	Saini, RK; Nile, SH; Park, SW		Saini, Ramesh Kumar; Nile, Shivraj Hariram; Park, Se Won		Carotenoids from fruits and vegetables: Chemistry, analysis, occurrence, bioavailability and biological activities	FOOD RESEARCH INTERNATIONAL		English	Review	Carotenoids; Lutein; beta-Carotene; Lycopene; Biosynthesis; Physiology; Processing	BETA-IONONE RING; ANTIOXIDANT ACTIVITY; ASCORBIC-ACID; VITAMIN-A; ASTAXANTHIN ACCUMULATION; LIQUID-CHROMATOGRAPHY; BIOACTIVE COMPOSITION; SOLVENT-EXTRACTION; METHYL JASMONATE; FOOD CAROTENOIDS	Fruits and vegetables are generally considered as important contributors to a healthy diet and their intake is extremely helpful to reduce the risk of specific diseases like cancers, cardiovascular diseases, neural tube defects, and cataracts. Bioactive constituents from fruits and vegetables, such as carotenoids, folic acid and dietary fiber appear to play important roles in the prevention of th…	[Saini, Ramesh Kumar; Nile, Shivraj Hariram; Park, Se Won] Konkuk Univ, Coll Life & Environm Sci, Dept Bioresources & Food Sci, Seoul 143701, South Korea	Konkuk University	Saini, RK (通讯作者)，Konkuk Univ, Coll Life & Environm Sci, Dept Bioresources & Food Sci, Seoul 143701, South Korea.	saini_1997@yahoo.com; sewpark@konkuk.ac.kr	Nile, Shivraj Hariram/HCH-4220-2022; SAINI, RAMESH KUMAR/L-4467-2017	Nile, Shivraj Hariram/0000-0003-3141-5754; SAINI, RAMESH KUMAR/0000-0001-9052-9941	KU Research Professor Programme of Konkuk University, Seoul, South Korea; Export Promotion Technology Development Program, Ministry of Agriculture, Food and Rural Affairs, South Korea	KU Research Professor Programme of Konkuk University, Seoul, South Korea; Export Promotion Technology Development Program, Ministry of Agriculture, Food and Rural Affairs, South Korea	This paper was supported by the KU Research Professor Programme of Konkuk University, Seoul, South Korea. Also, financial support from the Export Promotion Technology Development Program, Ministry of Agriculture, Food and Rural Affairs, South Korea is highly acknowledged.	134	382	405	22	438	ELSEVIER	AMSTERDAM	RADARWEG 29, 1043 NX AMSTERDAM, NETHERLANDS	0963-9969	1873-7145		FOOD RES INT	Food Res. Int.	OCT	2015	76		3			735	750		10.1016/j.foodres.2015.07.047	http://dx.doi.org/10.1016/j.foodres.2015.07.047		16	Food Science & Technology
S	Wu, F; Groopman, JD; Pestka, JJ	Doyle, MP; Klaenhammer, TR	Wu, Felicia; Groopman, John D.; Pestka, James J.		Public Health Impacts of Foodborne Mycotoxins	ANNUAL REVIEW OF FOOD SCIENCE AND TECHNOLOGY, VOL 5	Annual Review of Food Science and Technology	English	Review; Book Chapter	aflatoxins; fumonisins; trichothecenes; ochratoxin A; human disease; interventions	KASHIN-BECK DISEASE; HEPATITIS-B-VIRUS; LIVER-CANCER RISK; HEPATOCELLULAR-CARCINOMA; AFLATOXIN EXPOSURE; OCHRATOXIN-A; T-2 TOXIN; DIETARY AFLATOXIN; P53 MUTATIONS; MOLECULAR DOSIMETRY	Mycotoxins are toxic and carcinogenic metabolites produced by fungi that colonize food crops. The most agriculturally important mycotoxins known today are aflatoxins, which cause liver cancer and have also been implicated in child growth impairment and acute toxicoses; fumonisins, which have been associated with esophageal cancer (EC) and neural tube defects (NTDs); deoxynivalenol (DON) and other…	[Wu, Felicia; Pestka, James J.] Michigan State Univ, Dept Food Sci & Human Nutr, E Lansing, MI 48824 USA; [Groopman, John D.] Johns Hopkins Bloomberg Sch Publ Hlth, Dept Environm Hlth Sci, Baltimore, MD 21205 USA	Michigan State University; Johns Hopkins University; Johns Hopkins Bloomberg School of Public Health	Wu, F (通讯作者)，Michigan State Univ, Dept Food Sci & Human Nutr, E Lansing, MI 48824 USA.	fwu@msu.edu; jgroopma@jhsph.edu; pestka@msu.edu	/X-4205-2019	/0000-0003-4690-2133	NCI NIH HHS [5R01CA153073-02] Funding Source: Medline; NIEHS NIH HHS [ES03553, P30 ES003819, P01 ES006052] Funding Source: Medline	NCI NIH HHS(United States Department of Health & Human ServicesNational Institutes of Health (NIH) - USANIH National Cancer Institute (NCI)); NIEHS NIH HHS(United States Department of Health & Human ServicesNational Institutes of Health (NIH) - USANIH National Institute of Environmental Health Sciences (NIEHS))		150	357	370	16	278	ANNUAL REVIEWS	PALO ALTO	4139 EL CAMINO WAY, PO BOX 10139, PALO ALTO, CA 94303-0897 USA	1941-1413	1941-1421	978-0-8243-4905-9	ANNU REV FOOD SCI T	Annu. Rev. Food Sci. Technol.		2014	5					351	372		10.1146/annurev-food-030713-092431	http://dx.doi.org/10.1146/annurev-food-030713-092431		22	Food Science & Technology
J	Copp, AJ; Stanier, P; Greene, NDE		Copp, Andrew J.; Stanier, Philip; Greene, Nicholas D. E.		Neural tube defects: recent advances, unsolved questions, and controversies	LANCET NEUROLOGY		English	Review		PLANAR-CELL-POLARITY; FOLIC-ACID SUPPLEMENTATION; FOLATE-DEFICIENCY; MOUSE EMBRYOS; CONGENITAL-MALFORMATIONS; CONVERGENT EXTENSION; PLASMA FOLATE; FLOOR PLATE; CURLY TAIL; CLOSURE	Neural tube defects are severe congenital malformations affecting around one in every 1000 pregnancies. An innovation in clinical management has come from the finding that closure of open spina bifida lesions in utero can diminish neurological dysfunction in children. Primary prevention with folic acid has been enhanced through introduction of mandatory food fortification in some countries, altho…	[Copp, Andrew J.; Stanier, Philip; Greene, Nicholas D. E.] UCL Inst Child Hlth, Neural Dev Unit, London WC1N 1EH, England; [Copp, Andrew J.; Stanier, Philip; Greene, Nicholas D. E.] UCL Inst Child Hlth, Newlife Birth Defects Res Ctr, London WC1N 1EH, England	University of London; University College London; University of London; University College London	Copp, AJ (通讯作者)，UCL Inst Child Hlth, Neural Dev Unit, 30 Guilford St, London WC1N 1EH, England.	a.copp@ucl.ac.uk	Stanier, Philip/C-1593-2008; Copp, Andrew/C-4174-2008	Stanier, Philip/0000-0001-9340-8117; Copp, Andrew/0000-0002-2544-9117; Greene, Nicholas D.E./0000-0002-4170-5248	Wellcome Trust [087259, 087525]; Medical Research Council [G0801124, G0802163, J003794]; Sparks [04IMP03, 06ICH06, 08ICH03, 09ICH01]; Newlife [11/12-06]; MRC [MR/K022741/1, MR/J003794/1, G0801124, G0802163] Funding Source: UKRI; Great Ormond Street Hospital Childrens Charity [V1241] Funding Source: researchfish; Medical Research Council [MR/J003794/1, G0802163, MR/K022741/1, G0801124] Funding Sou…	Wellcome Trust(Wellcome Trust); Medical Research Council(UK Research & Innovation (UKRI)Medical Research Council UK (MRC)Spanish Government); Sparks; Newlife; MRC(UK Research & Innovation (UKRI)Medical Research Council UK (MRC)); Great Ormond Street Hospital Childrens Charity; Medical Research Council(UK Research & Innovation (UKRI)Medical Research Council UK (MRC)); Sparks Charity	This work was supported by the Wellcome Trust (grants 087259 and 087525), the Medical Research Council (grants G0801124, G0802163, and J003794), Sparks (grants 04IMP03, 06ICH06, 08ICH03, and 09ICH01), and Newlife (grant 11/12-06).	125	350	367	4	137	ELSEVIER SCIENCE INC	NEW YORK	STE 800, 230 PARK AVE, NEW YORK, NY 10169 USA	1474-4422	1474-4465		LANCET NEUROL	Lancet Neurol.	AUG	2013	12	8				799	810		10.1016/S1474-4422(13)70110-8	http://dx.doi.org/10.1016/S1474-4422(13)70110-8		12	Clinical Neurology
J	Williams, J; Mai, CT; Mulinare, J; Isenburg, J; Flood, TJ; Ethen, M; Frohnert, B; Kirby, RS		Williams, Jennifer; Mai, Cara T.; Mulinare, Joe; Isenburg, Jennifer; Flood, Timothy J.; Ethen, Mary; Frohnert, Barbara; Kirby, Russell S.		Updated Estimates of Neural Tube Defects Prevented by Mandatory Folic Acid Fortification - United States, 1995-2011	MMWR-MORBIDITY AND MORTALITY WEEKLY REPORT		English	Article		POPULATION; FOLATE		[Williams, Jennifer; Mai, Cara T.; Mulinare, Joe; Isenburg, Jennifer] CDC, Natl Ctr Birth Defects & Dev Disabil, Atlanta, GA 30333 USA; [Flood, Timothy J.] Arizona Dept Hlth Serv, Bur Publ Hlth Stat, Phoenix, AZ 85007 USA; [Ethen, Mary] Texas Dept State Hlth Serv, Birth Defects Epidemiol & Surveillance Branch, Austin, TX USA; [Frohnert, Barbara] Minnesota Dept Hlth, Div Community & Family Hlth, M…	Centers for Disease Control & Prevention - USA; Arizona Department of Health Services; Texas Department of State Health Services; Minnesota Department of Health (MHD); State University System of Florida; University of South Florida	Williams, J (通讯作者)，CDC, Natl Ctr Birth Defects & Dev Disabil, Atlanta, GA 30333 USA.	jwilliams2@cdc.gov	Kirby, Russell/E-8113-2018	Kirby, Russell/0000-0002-3489-401X				10	347	355	1	53	CENTERS DISEASE CONTROL & PREVENTION	ATLANTA	1600 CLIFTON RD, ATLANTA, GA 30333 USA	0149-2195	1545-861X		MMWR-MORBID MORTAL W	MMWR-Morb. Mortal. Wkly. Rep.	JAN 16	2015	64	1				1	5					5	Public, Environmental & Occupational Health
J	Green, R; Allen, LH; Bjorke-Monsen, AL; Brito, A; Gueant, JL; Miller, JW; Molloy, AM; Nexo, E; Stabler, S; Toh, BH; Ueland, PM; Yajnik, C		Green, Ralph; Allen, Lindsay H.; Bjorke-Monsen, Anne-Lise; Brito, Alex; Gueant, Jean-Louis; Miller, Joshua W.; Molloy, Anne M.; Nexo, Ebba; Stabler, Sally; Toh, Ban-Hock; Ueland, Per Magne; Yajnik, Chittaranjan		Vitamin B-12 deficiency	NATURE REVIEWS DISEASE PRIMERS		English	Article		METHYLMALONIC ACID CONCENTRATIONS; HEALTHY OLDER-PEOPLE; NEURAL-TUBE DEFECTS; FOLIC-ACID; COBALAMIN DEFICIENCY; COGNITIVE IMPAIRMENT; TOTAL HOMOCYSTEINE; INTRINSIC-FACTOR; CONTROLLED-TRIAL; ABSORPTION TEST	Vitamin B-12 (B12; also known as cobalamin) is a B vitamin that has an important role in cellular metabolism, especially in DNA synthesis, methylation and mitochondrial metabolism. Clinical B12 deficiency with classic haematological and neurological manifestations is relatively uncommon. However, subclinical deficiency affects between 2.5% and 26% of the general population depending on the defini…	[Green, Ralph] Univ Calif Davis, Dept Pathol & Lab Med, 4400 5 St,PATH Bldg, Davis, CA 95817 USA; [Allen, Lindsay H.; Brito, Alex] Univ Calif Davis, USDA, ARS, Western Human Nutr Res Ctr, Davis, CA 95616 USA; [Bjorke-Monsen, Anne-Lise; Ueland, Per Magne] Haukeland Hosp, Lab Clin Biochem, Bergen, Norway; [Gueant, Jean-Louis] Univ Lorraine, INSERM, UMRS 954, N GERE, Nancy, France; [Gueant, Jean-Lou…	University of California System; University of California Davis; United States Department of Agriculture (USDA); University of California System; University of California Davis; University of Bergen; Haukeland University Hospital; Institut National de la Sante et de la Recherche Medicale (Inserm); Universite de Lorraine; Institut National de la Sante et de la Recherche Medicale (Inserm); Rutgers …	Green, R (通讯作者)，Univ Calif Davis, Dept Pathol & Lab Med, 4400 5 St,PATH Bldg, Davis, CA 95817 USA.	rgreen@ucdavis.edu	Brito, Alex/I-2858-2013; Ueland, Per M/C-7340-2013	Brito, Alex/0000-0002-6212-8814; Nexo, Ebba/0000-0001-9406-9081				207	336	346	16	169	NATURE PORTFOLIO	BERLIN	HEIDELBERGER PLATZ 3, BERLIN, 14197, GERMANY	2056-676X			NAT REV DIS PRIMERS	Nat. Rev. Dis. Primers	JUN 29	2017	3							17040	10.1038/nrdp.2017.40	http://dx.doi.org/10.1038/nrdp.2017.40		19	Medicine, General & Internal
J	Honein, MA; Dawson, AL; Petersen, EE; Jones, AM; Lee, EH; Yazdy, MM; Ahmad, N; Macdonald, J; Evert, N; Bingham, A; Ellington, SR; Shapiro-Mendoza, CK; Oduyebo, T; Fine, AD; Brown, CM; Sommer, JN; Gupta, J; Cavicchia, P; Slavinski, S; White, JL; Owen, SM; Petersen, LR; Boyle, C; Meaney-Delman, D; Jamieson, DJ		Honein, Margaret A.; Dawson, April L.; Petersen, Emily E.; Jones, Abbey M.; Lee, Ellen H.; Yazdy, Mahsa M.; Ahmad, Nina; Macdonald, Jennifer; Evert, Nicole; Bingham, Andrea; Ellington, Sascha R.; Shapiro-Mendoza, Carrie K.; Oduyebo, Titilope; Fine, Anne D.; Brown, Catherine M.; Sommer, Jamie N.; Gupta, Jyoti; Cavicchia, Philip; Slavinski, Sally; White, Jennifer L.; Owen, S. Michele; Petersen, Lyl…	US Zika Pregnancy Registry	Birth Defects Among Fetuses and Infants of US Women With Evidence of Possible Zika Virus Infection During Pregnancy	JAMA-JOURNAL OF THE AMERICAN MEDICAL ASSOCIATION		English	Article		UPDATE INTERIM GUIDANCE; UNITED-STATES; TRANSMISSION; EXPOSURE; BRAZIL; RISK	IMPORTANCE Understanding the risk of birth defects associated with Zika virus infection during pregnancy may help guide communication, prevention, and planning efforts. In the absence of Zika virus, microcephaly occurs in approximately 7 per 10 000 live births. OBJECTIVE To estimate the preliminary proportion of fetuses or infants with birth defects after maternal Zika virus infection by trimeste…	[Honein, Margaret A.; Dawson, April L.; Petersen, Emily E.; Jones, Abbey M.; Ellington, Sascha R.; Shapiro-Mendoza, Carrie K.; Oduyebo, Titilope; Meaney-Delman, Dana; Jamieson, Denise J.] Ctr Dis Control & Prevent, 1600 Clifton Rd NE, Atlanta, GA 30333 USA; [Lee, Ellen H.; Fine, Anne D.; Slavinski, Sally] New York City Dept Hlth & Mental Hyg, Queens, NY USA; [Yazdy, Mahsa M.; Brown, Catherine M.]…	Centers for Disease Control & Prevention - USA; New York City Department of Health & Mental Hygiene; Massachusetts Department of Public Health; State University of New York (SUNY) System; Texas Department of State Health Services	Honein, MA (通讯作者)，Ctr Dis Control & Prevent, 1600 Clifton Rd NE, Atlanta, GA 30333 USA.	mrh7@cdc.gov	Shapiro-Mendoza, Carrie/B-3236-2009; amsalu, ribka/G-8780-2019	Shapiro-Mendoza, Carrie/0000-0002-8204-8782; Morrison, Andrea/0009-0006-8686-2841; Yazdy, Mahsa/0000-0002-7415-5350; Jamieson, Denise/0000-0003-2597-1201				39	332	336	4	420	AMER MEDICAL ASSOC	CHICAGO	330 N WABASH AVE, STE 39300, CHICAGO, IL 60611-5885 USA	0098-7484	1538-3598		JAMA-J AM MED ASSOC	JAMA-J. Am. Med. Assoc.	JAN 3	2017	317	1				59	68		10.1001/jama.2016.19006	http://dx.doi.org/10.1001/jama.2016.19006		10	Medicine, General & Internal
S	Greene, NDE; Copp, AJ	Hyman, SE	Greene, Nicholas D. E.; Copp, Andrew J.		Neural Tube Defects	ANNUAL REVIEW OF NEUROSCIENCE, VOL 37	Annual Review of Neuroscience	English	Review; Book Chapter	anencephaly; spina bifida; folic acid; genetics	PLANAR-CELL-POLARITY; MOUSE SPINAL NEURULATION; ONE-CARBON METABOLISM; FOLIC-ACID; CONVERGENT EXTENSION; EMBRYONIC-DEVELOPMENT; SONIC HEDGEHOG; MICE LACKING; MOLECULAR-MECHANISMS; FOLATE METABOLISM	Neural tube defects (NTDs), including spina bifida and anencephaly, are severe birth defects of the central nervous system that originate during embryonic development when the neural tube fails to close completely. Human NTDs aremultifactorial, with contributions from both genetic and environmental factors. The genetic basis is not yet well understood, but several nongenetic risk factors have bee…	[Greene, Nicholas D. E.; Copp, Andrew J.] UCL, Inst Child Hlth, Newlife Birth Defects Res Ctr, London WC1N 1EH, England	University of London; University College London	Greene, NDE (通讯作者)，UCL, Inst Child Hlth, Newlife Birth Defects Res Ctr, London WC1N 1EH, England.	n.greene@ucl.ac.uk	Copp, Andrew/C-4174-2008	Copp, Andrew/0000-0002-2544-9117; Greene, Nicholas D.E./0000-0002-4170-5248	Medical Research Council [J003794, MR/J003794/1, G0801124, G0802163] Funding Source: Medline; Wellcome Trust [087525] Funding Source: Medline; Medical Research Council [G0801124, MR/J003794/1, G0802163] Funding Source: researchfish; MRC [G0802163, MR/J003794/1, G0801124] Funding Source: UKRI	Medical Research Council(UK Research & Innovation (UKRI)Medical Research Council UK (MRC)Spanish Government); Wellcome Trust(Wellcome Trust); Medical Research Council(UK Research & Innovation (UKRI)Medical Research Council UK (MRC)); MRC(UK Research & Innovation (UKRI)Medical Research Council UK (MRC))		147	331	351	6	120	ANNUAL REVIEWS	PALO ALTO	4139 EL CAMINO WAY, PO BOX 10139, PALO ALTO, CA 94303-0897 USA	0147-006X	1545-4126	978-0-8243-2437-7	ANNU REV NEUROSCI	Annu. Rev. Neurosci.		2014	37					221	242		10.1146/annurev-neuro-062012-170354	http://dx.doi.org/10.1146/annurev-neuro-062012-170354		22	Neurosciences
J	Suren, P; Roth, C; Bresnahan, M; Haugen, M; Hornig, M; Hirtz, D; Lie, KK; Lipkin, WI; Magnus, P; Reichborn-Kjennerud, T; Schjolberg, S; Smith, GD; Oyen, AS; Susser, E; Stoltenberg, C		Suren, Pal; Roth, Christine; Bresnahan, Michaeline; Haugen, Margaretha; Hornig, Mady; Hirtz, Deborah; Lie, Kari Kveim; Lipkin, W. Ian; Magnus, Per; Reichborn-Kjennerud, Ted; Schjolberg, Synnve; Smith, George Davey; Oyen, Anne-Siri; Susser, Ezra; Stoltenberg, Camilla		Association Between Maternal Use of Folic Acid Supplements and Risk of Autism Spectrum Disorders in Children	JAMA-JOURNAL OF THE AMERICAN MEDICAL ASSOCIATION		English	Article		NEURAL-TUBE DEFECTS; NORWEGIAN MOTHER; PREGNANT-WOMEN; COHORT; PREVALENCE; FOLATE; DELAY	Importance Prenatal folic acid supplements reduce the risk of neural tube defects in children, but it has not been determined whether they protect against other neurodevelopmental disorders. Objective To examine the association between maternal use of prenatal folic acid supplements and subsequent risk of autism spectrum disorders (ASDs) (autistic disorder, Asperger syndrome, pervasive developmen…	[Suren, Pal; Roth, Christine; Haugen, Margaretha; Lie, Kari Kveim; Magnus, Per; Reichborn-Kjennerud, Ted; Schjolberg, Synnve; Oyen, Anne-Siri; Stoltenberg, Camilla] Norwegian Inst Publ Hlth, N-0403 Oslo, Norway; [Suren, Pal] UCL Inst Child Hlth, Ctr Paediat Epidemiol & Biostat, London, England; [Roth, Christine; Bresnahan, Michaeline; Hornig, Mady; Lipkin, W. Ian; Susser, Ezra] Columbia Univ, Mai…	Norwegian Institute of Public Health (NIPH); University of London; University College London; Columbia University; New York State Psychiatry Institute; National Institutes of Health (NIH) - USA; NIH National Institute of Neurological Disorders & Stroke (NINDS); University of Oslo; University of Bristol; University of Bergen	Suren, P (通讯作者)，Norwegian Inst Publ Hlth, POB 4404, N-0403 Oslo, Norway.	pal.suren@fhi.no	Hornig, Mady/AAE-8431-2020; Davey Smith, George/A-7407-2013; Lipkin, W. Ian/ABE-6216-2020; Stoltenberg, Camilla/G-5090-2017; Haugen, Margaretha/H-7007-2016	Hornig, Mady/0000-0001-7572-3092; Davey Smith, George/0000-0002-1407-8314; Lipkin, W. Ian/0000-0002-8768-9386; Oyen, Anne-Siri/0000-0002-1637-992X; s, hema/0000-0002-3440-9475; Haugen, Margaretha/0000-0001-5924-5000; Venkatasubramanian, Siddharth/0000-0002-5860-0768	Norwegian Ministry of Health and Care Services; Norwegian Ministry of Education and Research; Research Council of Norway/FUGE [151918]; National Institute of Neurological Disorders and Stroke (NINDS) [NS47537]; National Institute of Environmental Health Sciences (NIEHS) [NO-ES-75558]; NINDS [NS47537]; Research Council of Norway [185476, 190694]; Medical Research Council [G9815508] Funding Source:…	Norwegian Ministry of Health and Care Services; Norwegian Ministry of Education and Research; Research Council of Norway/FUGE(Research Council of Norway); National Institute of Neurological Disorders and Stroke (NINDS)(United States Department of Health & Human ServicesNational Institutes of Health (NIH) - USANIH National Institute of Neurological Disorders & Stroke (NINDS)); National Institute o…	The Norwegian Mother and Child Cohort is supported by the Norwegian Ministry of Health and Care Services, the Norwegian Ministry of Education and Research, the Research Council of Norway/FUGE (grant 151918), the National Institute of Neurological Disorders and Stroke (NINDS) (grant NS47537 [Dr Lipkin]), and the National Institute of Environmental Health Sciences (NIEHS) (contract NO-ES-75558). Th…	25	331	360	5	136	AMER MEDICAL ASSOC	CHICAGO	330 N WABASH AVE, STE 39300, CHICAGO, IL 60611-5885 USA	0098-7484	1538-3598		JAMA-J AM MED ASSOC	JAMA-J. Am. Med. Assoc.	FEB 13	2013	309	6				570	577		10.1001/jama.2012.155925	http://dx.doi.org/10.1001/jama.2012.155925		8	Medicine, General & Internal
J	Copp, AJ; Adzick, NS; Chitty, LS; Fletcher, JM; Holmbeck, G; Shaw, GM		Copp, Andrew J.; Adzick, N. Scott; Chitty, Lyn S.; Fletcher, Jack M.; Holmbeck, GraysonN.; Shaw, Gary M.		Spina bifida	NATURE REVIEWS DISEASE PRIMERS		English	Article		NEURAL-TUBE DEFECTS; FOLIC-ACID FORTIFICATION; QUALITY-OF-LIFE; SAN-JOAQUIN VALLEY; FETAL SURGERY; YOUNG-ADULTS; CONGENITAL-ANOMALIES; CORPUS-CALLOSUM; BIRTH-DEFECTS; PSYCHOSOCIAL ADJUSTMENT	Spina bifida is a birth defect in which the vertebral column is open, often with spinal cord involvement. The most clinically significant subtype is myelomeningocele (open spina bifida), which is a condition characterized by failure of the lumbosacral spinal neural tube to close during embryonic development. The exposed neural tissue degenerates in utero, resulting in neurological deficit that va…	[Copp, Andrew J.] UCL, Newlife Birth Defects Res Ctr, Inst Child Hlth, 30 Guilford St, London WC1N 1EH, England; [Adzick, N. Scott] Childrens Hosp Philadelphia, Dept Surg, Philadelphia, PA 19104 USA; [Chitty, Lyn S.] UCL, Genet & Genom Med, Great Ormond St Hosp Children NHS Fdn Trust, Inst Child Hlth, London, England; [Chitty, Lyn S.] UCL Hosp NHS Fdn Trust, London, England; [Fletcher, Jack M.] U…	University of London; University College London; University of Pennsylvania; Pennsylvania Medicine; Childrens Hospital of Philadelphia; University of London; University College London; Great Ormond Street Hospital for Children NHS Foundation Trust; University of London; University College London; University of Houston System; University of Houston; Loyola University Chicago; Stanford University	Copp, AJ (通讯作者)，UCL, Newlife Birth Defects Res Ctr, Inst Child Hlth, 30 Guilford St, London WC1N 1EH, England.	a.copp@ucl.ac.uk	Fletcher, Jack/AAX-2931-2020; Copp, Andrew/C-4174-2008; Lin, Lenny/R-9870-2019; fletcher, jack/Q-5975-2019	Copp, Andrew/0000-0002-2544-9117; Lin, Lenny/0000-0003-1990-6788; Shaw, Gary/0000-0001-7438-4914; Holmbeck, Grayson/0000-0002-2216-1927; chitty, lyn/0000-0002-4857-7138	Wellcome Trust [087525]; Eunice Kennedy Shriver National Institute of Child Health and Human Development, US National Institutes of Health [U10 HD041666, P01 HD35946, R01-HD048629]; March of Dimes Foundation [12-FY13-271]; Joint Medical Research Council-Wellcome Trust Human Developmental Biology Resource [099175]; MRC [MC_PC_15004, G0700089, G0801124] Funding Source: UKRI; Medical Research Counci…	Wellcome Trust(Wellcome TrustEuropean Commission); Eunice Kennedy Shriver National Institute of Child Health and Human Development, US National Institutes of Health(United States Department of Health & Human ServicesNational Institutes of Health (NIH) - USANIH Eunice Kennedy Shriver National Institute of Child Health & Human Development (NICHD)); March of Dimes Foundation(March of Dimes); Joint M…	The authors acknowledge grants from The Wellcome Trust (grant 087525 to A.J.C.), the Eunice Kennedy Shriver National Institute of Child Health and Human Development, US National Institutes of Health (grants U10 HD041666 to N.S.A., P01 HD35946 to J.M.F. and R01-HD048629 to G.N.H.) and the March of Dimes Foundation (grant 12-FY13-271 to G.N.H.). Images of human embryonic material are provided by th…	236	297	305	5	59	NATURE PUBLISHING GROUP	LONDON	MACMILLAN BUILDING, 4 CRINAN ST, LONDON N1 9XW, ENGLAND	2056-676X			NAT REV DIS PRIMERS	Nat. Rev. Dis. Primers	APR 30	2015	1							15007	10.1038/nrdp.2015.7	http://dx.doi.org/10.1038/nrdp.2015.7		18	Medicine, General & Internal
J	Mai, CT; Isenburg, JL; Canfield, MA; Meyer, RE; Correa, A; Alverson, CJ; Lupo, PJ; Riehle-Colarusso, T; Cho, SJ; Aggarwal, D; Kirby, RS; Nembhard, W; Shan, XY; Higgins, C; Forestieri, N; Denson, L; Hoyt, A; Shumate, C; Ethen, M; Nance, A; Huynh, M		Mai, Cara T.; Isenburg, Jennifer L.; Canfield, Mark A.; Meyer, Robert E.; Correa, Adolfo; Alverson, Clinton J.; Lupo, Philip J.; Riehle-Colarusso, Tiffany; Cho, Sook Ja; Aggarwal, Deepa; Kirby, Russell S.; Nembhard, Wendy; Shan, Xiaoyi; Higgins, Cathleen; Forestieri, Nina; Denson, Lindsay; Hoyt, Adrienne; Shumate, Charles; Ethen, Mary; Nance, Amy; Huynh, Maria	Natl Birth Defects Prevention	National population-based estimates for major birth defects, 2010-2014	BIRTH DEFECTS RESEARCH		English	Article	population-based surveillance; birth defects; congenital anomalies; national estimates; United States	NEURAL-TUBE DEFECTS; CONGENITAL HEART-DEFECTS; UNITED-STATES; SURVEILLANCE PROGRAMS; PULSE OXIMETRY; INCREASED RISK; FOLIC-ACID; PREVALENCE; TRENDS; GASTROSCHISIS	Background Using the National Birth Defects Prevention Network (NBDPN) annual data report, U.S. national prevalence estimates for major birth defects are developed based on birth cohort 2010-2014. Methods Data from 39 U.S. population-based birth defects surveillance programs (16 active case-finding, 10 passive case-finding with case confirmation, and 13 passive without case confirmation) were use…	[Mai, Cara T.; Isenburg, Jennifer L.; Alverson, Clinton J.; Riehle-Colarusso, Tiffany] Ctr Dis Control & Prevent, Div Congenital & Dev Disorders, Natl Ctr Birth Defects & Dev Disabil, 4770 Buford Highway,MS S106-3, Atlanta, GA 30341 USA; [Canfield, Mark A.] Texas Dept State Hlth Serv, Birth Defects Epidemiol & Surveillance Branch, Austin, TX USA; [Meyer, Robert E.] State Ctr Hlth Stat, North Caro…	Centers for Disease Control & Prevention - USA; Texas Department of State Health Services; University of North Carolina; University of North Carolina Chapel Hill; University of Mississippi; University of Mississippi Medical Center; Baylor College of Medicine; Minnesota Department of Health (MHD); California Department of Public Health; State University System of Florida; University of South Flori…	Mai, CT (通讯作者)，Ctr Dis Control & Prevent, Div Congenital & Dev Disorders, Natl Ctr Birth Defects & Dev Disabil, 4770 Buford Highway,MS S106-3, Atlanta, GA 30341 USA.	cmai@cdc.gov	Kirby, Russell/E-8113-2018	Kirby, Russell/0000-0002-3489-401X; Lupo, Philip/0000-0003-0978-5863				39	297	301	2	27	WILEY	HOBOKEN	111 RIVER ST, HOBOKEN 07030-5774, NJ USA	2472-1727			BIRTH DEFECTS RES	Birth Defects Res.	NOV 1	2019	111	18			SI	1420	1435		10.1002/bdr2.1589	http://dx.doi.org/10.1002/bdr2.1589	OCT 2019	16	Developmental Biology; Toxicology
J	Gernand, AD; Schulze, KJ; Stewart, CP; West, KP; Christian, P		Gernand, Alison D.; Schulze, Kerry J.; Stewart, Christine P.; West, Keith P., Jr.; Christian, Parul		Micronutrient deficiencies in pregnancy worldwide: health effects and prevention	NATURE REVIEWS ENDOCRINOLOGY		English	Review		MATERNAL MULTIPLE MICRONUTRIENT; LOW-BIRTH-WEIGHT; FOLIC-ACID SUPPLEMENTATION; VITAMIN-A SUPPLEMENTATION; NEURAL-TUBE DEFECTS; SCHOOL-AGE-CHILDREN; FOR-GESTATIONAL-AGE; DOUBLE-BLIND; FOLLOW-UP; MENTAL-DEVELOPMENT	Micronutrients, vitamins and minerals accessible from the diet, are essential for biologic activity. Micronutrient status varies widely throughout pregnancy and across populations. Women in low-income countries often enter pregnancy malnourished, and the demands of gestation can exacerbate micronutrient deficiencies with health consequences for the fetus. Examples of efficacious single micronutri…	[Gernand, Alison D.] Penn State Univ, Dept Nutr Sci, Chandlee Lab 100, University Pk, PA 16802 USA; [Schulze, Kerry J.; West, Keith P., Jr.; Christian, Parul] Johns Hopkins Bloomberg Sch Publ Hlth, Ctr Human Nutr, Dept Int Hlth, 615 North Wolfe St, Baltimore, MD 21205 USA; [Stewart, Christine P.] Univ Calif Davis, Dept Nutr, One Shields Ave, Davis, CA 95616 USA	Pennsylvania Commonwealth System of Higher Education (PCSHE); Pennsylvania State University; Pennsylvania State University - University Park; Johns Hopkins University; Johns Hopkins Bloomberg School of Public Health; University of California System; University of California Davis	West, KP (通讯作者)，Johns Hopkins Bloomberg Sch Publ Hlth, Ctr Human Nutr, Dept Int Hlth, 615 North Wolfe St, Baltimore, MD 21205 USA.	kwest1@jhu.edu	Gernand, Alison/W-8158-2019	Gernand, Alison/0000-0002-5661-7785	Eunice Kennedy Shriver National Institute of Child Health and Human Development of the National Institutes of Health [K12HD055882]; Bill and Melinda Gates Foundation [OPPGD759]; Thrasher Research Fund [11860]; Bill and Melinda Gates Foundation, Seattle, Washington, USA [GH614, OPP5241]; Sight and Life Global Nutrition Research Institute, Baltimore, Maryland, USA	Eunice Kennedy Shriver National Institute of Child Health and Human Development of the National Institutes of Health(United States Department of Health & Human ServicesNational Institutes of Health (NIH) - USANIH Eunice Kennedy Shriver National Institute of Child Health & Human Development (NICHD)); Bill and Melinda Gates Foundation(Bill & Melinda Gates Foundation); Thrasher Research Fund; Bill a…	The authors wish to thank R. Guida and C. Reynolds, Pennsylvania State University, PA, USA for assistance with the literature review. A.D.G. is supported by the Eunice Kennedy Shriver National Institute of Child Health and Human Development of the National Institutes of Health under BIRCWH award number K12HD055882, 'Career Development Program in Women's Health Research at Penn State'. C.P.S. is s…	160	293	315	4	106	NATURE PORTFOLIO	BERLIN	HEIDELBERGER PLATZ 3, BERLIN, 14197, GERMANY	1759-5029	1759-5037		NAT REV ENDOCRINOL	Nat. Rev. Endocrinol.	MAY	2016	12	5				274	289		10.1038/nrendo.2016.37	http://dx.doi.org/10.1038/nrendo.2016.37		16	Endocrinology & Metabolism
J	Hamann, J; Aust, G; Arac, D; Engel, FB; Formstone, C; Fredriksson, R; Hall, RA; Harty, BL; Kirchhoff, C; Knapp, B; Krishnan, A; Liebscher, I; Lin, HH; Martinelli, DC; Monk, KR; Peeters, MC; Piao, XH; Promel, S; Schoneberg, T; Schwartz, TW; Singer, K; Stacey, M; Ushkaryov, YA; Vallon, M; Wolfrum, U; Wright, MW; Xu, L; Langenhan, T; Schoith, HB		Hamann, Joerg; Aust, Gabriela; Arac, Demet; Engel, Felix B.; Formstone, Caroline; Fredriksson, Robert; Hall, Randy A.; Harty, Breanne L.; Kirchhoff, Christiane; Knapp, Barbara; Krishnan, Arunkumar; Liebscher, Ines; Lin, Hsi-Hsien; Martinelli, David C.; Monk, Kelly R.; Peeters, Miriam C.; Piao, Xianhua; Proemel, Simone; Schoeneberg, Torsten; Schwartz, Thue W.; Singer, Kathleen; Stacey, Martin; Ush…		International Union of Basic and Clinical Pharmacology. XCIV. Adhesion G Protein-Coupled Receptors	PHARMACOLOGICAL REVIEWS		English	Review		BRAIN-SPECIFIC ANGIOGENESIS; PLANAR CELL POLARITY; 7-PASS TRANSMEMBRANE CADHERIN; BILATERAL FRONTOPARIETAL POLYMICROGYRIA; GENOME-WIDE ASSOCIATION; INTESTINAL EPITHELIAL-CELLS; SPERMATOGONIAL STEM-CELLS; PROMOTES MYOBLAST FUSION; NEURAL-TUBE DEFECTS; FAMILY MEMBER EMR2	The Adhesion family forms a large branch of the pharmacologically important superfamily of G protein-coupled receptors (GPCRs). As Adhesion GPCRs increasingly receive attention from a wide spectrum of biomedical fields, the Adhesion GPCR Consortium, together with the International Union of Basic and Clinical Pharmacology Committee on Receptor Nomenclature and Drug Classification, proposes a unifi…	[Hamann, Joerg] Univ Amsterdam, Acad Med Ctr, Dept Expt Immunol, NL-1105 AZ Amsterdam, Netherlands; [Aust, Gabriela] Univ Leipzig, Fac Med, Dept Surg, Res Labs, D-04109 Leipzig, Germany; [Liebscher, Ines; Proemel, Simone; Schoeneberg, Torsten] Univ Leipzig, Fac Med, Inst Biochem, D-04109 Leipzig, Germany; [Arac, Demet] Univ Chicago, Dept Biochem & Mol Biol, Chicago, IL 60637 USA; [Engel, Felix B.…	University of Amsterdam; Academic Medical Center Amsterdam; Leipzig University; Leipzig University; University of Chicago; University of Erlangen Nuremberg; University of London; King's College London; Uppsala University; Emory University; Washington University (WUSTL); University of Hamburg; University Medical Center Hamburg-Eppendorf; Johannes Gutenberg University of Mainz; Chang Gung Universit…	Hamann, J (通讯作者)，Univ Amsterdam, Acad Med Ctr, Dept Expt Immunol, Meibergdreef 9, NL-1105 AZ Amsterdam, Netherlands.	j.hamann@amc.uva.nl; helgis.schioth@bmc.uu.se	Wright, Mathew W/H-5394-2012; LIN, Hsi-Hsien/N-1488-2015; Langenhan, Tobias/AAY-3773-2020; Engel, Felix/A-1767-2008; Liebscher, Ines/AAX-7478-2020; Ushkaryov, Yuri/AAQ-2985-2020; Fredriksson, Robert/AAH-3921-2019	Wright, Mathew W/0000-0002-2650-2426; Langenhan, Tobias/0000-0002-9061-3809; Engel, Felix/0000-0003-2605-3429; Liebscher, Ines/0000-0003-4480-8987; Ushkaryov, Yuri/0000-0002-5712-8297; Fredriksson, Robert/0000-0002-2810-3226; Promel, Simone/0000-0001-7800-7323; Hamann, Jorg/0000-0002-9448-1727; Krishnan, Arunkumar/0000-0002-9677-9092; Hall, Randy/0000-0002-8318-8728; Martinelli, David/0000-0002-8…	Wellcome Trust [099156/Z/12/Z]; Novo Nordisk Fonden [NNF12OC1016287, NNF15OC0016184, NNF13OC0005723] Funding Source: researchfish	Wellcome Trust(Wellcome TrustEuropean Commission); Novo Nordisk Fonden(Novo Nordisk Foundation)	NC-IUPHAR is supported in part by Wellcome Trust Grant 099156/Z/12/Z.	313	288	311	5	88	AMER SOC PHARMACOLOGY EXPERIMENTAL THERAPEUTICS	BETHESDA	9650 ROCKVILLE PIKE, BETHESDA, MD 20814-3995 USA	0031-6997	1521-0081		PHARMACOL REV	Pharmacol. Rev.	APR	2015	67	2				338	367		10.1124/pr.114.009647	http://dx.doi.org/10.1124/pr.114.009647		30	Pharmacology & Pharmacy
J	Bailey, LB; Stover, PJ; McNulty, H; Fenech, MF; Gregory, JF; Mills, JL; Pfeiffer, CM; Fazili, Z; Zhang, M; Ueland, PM; Molloy, AM; Caudill, MA; Shane, B; Berry, RJ; Bailey, RL; Hausman, DB; Raghavan, R; Raiten, DJ		Bailey, Lynn B.; Stover, Patrick J.; McNulty, Helene; Fenech, Michael F.; Gregory, Jesse F., III; Mills, James L.; Pfeiffer, Christine M.; Fazili, Zia; Zhang, Mindy; Ueland, Per M.; Molloy, Anne M.; Caudill, Marie A.; Shane, Barry; Berry, Robert J.; Bailey, Regan L.; Hausman, Dorothy B.; Raghavan, Ramkripa; Raiten, Daniel J.		Biomarkers of Nutrition for Development-Folate Review	JOURNAL OF NUTRITION		English	Review	BOND; folate biomarkers; serum folate; RBC folate; homocysteine	NEURAL-TUBE DEFECTS; ONE-CARBON METABOLISM; PLASMA TOTAL HOMOCYSTEINE; UNMETABOLIZED FOLIC-ACID; TANDEM MASS-SPECTROMETRY; GENOMIC DNA METHYLATION; DRIED BLOOD SPOTS; B-VITAMIN STATUS; METHYLENETETRAHYDROFOLATE REDUCTASE GENE; KILLER-CELL CYTOTOXICITY	The Biomarkers of Nutrition for Development (BOND) project is designed to provide evidence-based advice to anyone with an interest in the role of nutrition in health. Specifically, the BOND program provides state-of-the-art information and service with regard to selection, use, and interpretation of biomarkers of nutrient exposure, status, function, and effect. To accomplish this objective, exper…	[Bailey, Lynn B.; Hausman, Dorothy B.] Univ Georgia, Dept Foods & Nutr, Athens, GA 30602 USA; [Stover, Patrick J.; Caudill, Marie A.] Cornell Univ, Div Nutr Sci, Ithaca, NY 14853 USA; [McNulty, Helene] Univ Ulster, Northern Ireland Ctr Food & Hlth, Biomed Sci Res Inst, Londonderry, NH USA; [Fenech, Michael F.] CSIRO, Genome Hlth Nutrigen Lab, Food Nutr & Bioprod Flagship, Adelaide, SA, Australia;…	University System of Georgia; University of Georgia; Cornell University; Commonwealth Scientific & Industrial Research Organisation (CSIRO); State University System of Florida; University of Florida; National Institutes of Health (NIH) - USA; Centers for Disease Control & Prevention - USA; University of Bergen; Trinity College Dublin; University of California System; University of California Berk…	Bailey, LB (通讯作者)，Univ Georgia, Dept Foods & Nutr, Athens, GA 30602 USA.	folate@uga.edu; raitend@mail.nih.gov	Ueland, Per M/C-7340-2013	Ueland, Per Magne/0000-0002-1903-0571; Berry, Robert/0000-0002-7162-5046; Bailey, Regan/0000-0003-0181-6223; McNulty, Helene/0000-0002-4366-6457; Molloy, Anne/0000-0002-1688-9049; Mills, James/0000-0003-4496-332X	Bill & Melinda Gates Foundation; PepsiCo; Division of Nutrition Research Coordination (DNRC, NIH); Office of Dietary Supplements (ODS, NIH); Eunice Kennedy Shriver National Institute of Child Health and Human Development (NICHD, NIH)	Bill & Melinda Gates Foundation(Bill & Melinda Gates FoundationCGIAR); PepsiCo; Division of Nutrition Research Coordination (DNRC, NIH)(United States Department of Health & Human ServicesNational Institutes of Health (NIH) - USA); Office of Dietary Supplements (ODS, NIH)(United States Department of Health & Human ServicesNational Institutes of Health (NIH) - USA); Eunice Kennedy Shriver National …	Published in a supplement to The Journal of Nutrition. The Biomarkers of Nutrition for Development (BOND) project was developed by the nutrition program staff of the Eunice Kennedy Shriver National Institute of Child Health and Human Development (NICHD) of the NIH within the US Department of Health and Human Services (DHHS). The initial 6 nutrients selected, iodine, vitamin A, iron, zinc, folate,…	444	283	295	14	108	OXFORD UNIV PRESS	OXFORD	GREAT CLARENDON ST, OXFORD OX2 6DP, ENGLAND	0022-3166	1541-6100		J NUTR	J. Nutr.	JUL	2015	145	7				1636	1680		10.3945/jn.114.206599	http://dx.doi.org/10.3945/jn.114.206599		45	Nutrition & Dietetics
J	Zaganjor, I; Sekkarie, A; Tsang, BL; Williams, J; Razzaghi, H; Mulinare, J; Sniezek, JE; Cannon, MJ; Rosenthal, J		Zaganjor, Ibrahim; Sekkarie, Ahlia; Tsang, Becky L.; Williams, Jennifer; Razzaghi, Hilda; Mulinare, Joseph; Sniezek, Joseph E.; Cannon, Michael J.; Rosenthal, Jorge		Describing the Prevalence of Neural Tube Defects Worldwide: A Systematic Literature Review	PLOS ONE		English	Review		FOLIC-ACID FORTIFICATION; MAJOR CONGENITAL-MALFORMATIONS; POPULATION-BASED SURVEY; BIRTH-DEFECTS; FLOUR FORTIFICATION; NATIONAL REGISTRY; SPINA-BIFIDA; RISK-FACTORS; ANOMALIES; REGION	Background Folate-sensitive neural tube defects (NTDs) are an important, preventable cause of morbidity and mortality worldwide. There is a need to describe the current global burden of NTDs and identify gaps in available NTD data. Methods and Findings We conducted a systematic review and searched multiple databases for NTD prevalence estimates and abstracted data from peer-reviewed literature, b…	[Zaganjor, Ibrahim; Sekkarie, Ahlia; Tsang, Becky L.; Williams, Jennifer; Razzaghi, Hilda; Mulinare, Joseph; Sniezek, Joseph E.; Cannon, Michael J.; Rosenthal, Jorge] Ctr Dis Control & Prevent, Natl Ctr Birth Defects & Dev Disabil, Atlanta, GA USA; [Razzaghi, Hilda; Mulinare, Joseph] Carter Consulting Inc, Atlanta, GA USA	Centers for Disease Control & Prevention - USA	Zaganjor, I (通讯作者)，Ctr Dis Control & Prevent, Natl Ctr Birth Defects & Dev Disabil, Atlanta, GA USA.	wwa3@cdc.gov	Cannon, Michael J/E-5894-2011; Razzaghi, Hilda/AFQ-9027-2022	Cannon, Michael J/0000-0001-5776-5010; Razzaghi, Hilda/0000-0002-8053-9748	Carter Consulting Inc.	Carter Consulting Inc.	AS, IZ, and BLT were supported in part by an appointment to the Research Participation Program at the CDC administered by the Oak Ridge Institute for Science and Education (ORISE). The commercial company, Carter Consulting Inc., provided support in the form of salaries for authors [HR, JM]. The funders had no role in study design, data collection and analysis, decision to publish, or preparation …	130	247	256	2	55	PUBLIC LIBRARY SCIENCE	SAN FRANCISCO	1160 BATTERY STREET, STE 100, SAN FRANCISCO, CA 94111 USA	1932-6203			PLOS ONE	PLoS One	APR 11	2016	11	4						e0151586	10.1371/journal.pone.0151586	http://dx.doi.org/10.1371/journal.pone.0151586		31	Multidisciplinary Sciences
J	Willhite, CC; Karyakina, NA; Yokel, RA; Yenugadhati, N; Wisniewski, TM; Arnold, IMF; Momoli, F; Krewski, D		Willhite, Calvin C.; Karyakina, Nataliya A.; Yokel, Robert A.; Yenugadhati, Nagarajkumar; Wisniewski, Thomas M.; Arnold, Ian M. F.; Momoli, Franco; Krewski, Daniel		Systematic review of potential health risks posed by pharmaceutical, occupational and consumer exposures to metallic and nanoscale aluminum, aluminum oxides, aluminum hydroxide and its soluble salts	CRITICAL REVIEWS IN TOXICOLOGY		English	Review	Alzheimer's disease; antiperspirants; aluminum nanoparticles; breast cancer; encephalopathy; microcytic anemia; minimal risk level; osteomalacia; parenteral nutrition; reactive oxygen; threshold limit value; tolerable weekly intake; vaccine adjuvants	CENTRAL-NERVOUS-SYSTEM; CHRONIC-RENAL-FAILURE; CANADIAN INFANT FORMULAS; INFLUENZA A/H5N1 VACCINE; INDUCED OXIDATIVE STRESS; IN-VITRO GENOTOXICITY; NEURAL-TUBE DEFECTS; LONG-TERM EXPOSURE; BREAST-CANCER RISK; ALZHEIMERS-DISEASE	Aluminum (Al) is a ubiquitous substance encountered both naturally (as the third most abundant element) and intentionally (used in water, foods, pharmaceuticals, and vaccines); it is also present in ambient and occupational airborne particulates. Existing data underscore the importance of Al physical and chemical forms in relation to its uptake, accumulation, and systemic bioavailability. The pre…	[Willhite, Calvin C.; Karyakina, Nataliya A.; Krewski, Daniel] Risk Sci Int, Ottawa, ON, Canada; [Willhite, Calvin C.; Yenugadhati, Nagarajkumar; Krewski, Daniel] McLaughlin Ctr Populat Hlth Risk Assessment, Ottawa, ON, Canada; [Yokel, Robert A.] Univ Kentucky, Coll Pharm, Lexington, KY USA; [Wisniewski, Thomas M.] NYU, Dept Neurol, Sch Med, New York, NY 10016 USA; [Wisniewski, Thomas M.] NYU, Sc…	University of Kentucky; New York University; New York University; New York University; McGill University; University of Ottawa; Ottawa Hospital Research Institute; University of Ottawa; University of Ottawa; Children's Hospital of Eastern Ontario	Willhite, CC (通讯作者)，Risk Sci Int, 55 Metcalfe St,Suite 700, Ottawa, ON, Canada.	calvinwillhite@hotmail.com	Wisniewski, Thomas/Q-6525-2019; Yokel, Robert/P-6310-2019; Willhite, Calvin/S-1653-2019	Wisniewski, Thomas/0000-0002-3379-8966; Yokel, Robert/0000-0001-5188-3972;	International Aluminium Institute (IAI); Aluminium Reach Consortium (ARC); Risk Sciences International (RSI), a Canadian company; Natural Sciences and Engineering Research Council of Canada (NSERC)	International Aluminium Institute (IAI); Aluminium Reach Consortium (ARC); Risk Sciences International (RSI), a Canadian company; Natural Sciences and Engineering Research Council of Canada (NSERC)(Natural Sciences and Engineering Research Council of Canada (NSERC))	Partial funding for this work was provided by a contract to review the recent scientific literature on health effects of aluminum between the International Aluminium Institute (IAI, www.world-aluminium.org), the Aluminium Reach Consortium (ARC, www.aluminium-reach-consortium.eu), and Risk Sciences International (RSI, www.risksciences.com), a Canadian company established in 2006 in partnership wit…	712	224	231	9	238	TAYLOR & FRANCIS LTD	ABINGDON	2-4 PARK SQUARE, MILTON PARK, ABINGDON OR14 4RN, OXON, ENGLAND	1040-8444	1547-6898		CRIT REV TOXICOL	Crit. Rev. Toxicol.	OCT	2014	44			4	SI	1	80		10.3109/10408444.2014.934439	http://dx.doi.org/10.3109/10408444.2014.934439		80	Toxicology
J	Marroquin-Cardona, AG; Johnson, NM; Phillips, TD; Hayes, AW		Marroquin-Cardona, A. G.; Johnson, N. M.; Phillips, T. D.; Hayes, A. W.		Mycotoxins in a changing global environment - A review	FOOD AND CHEMICAL TOXICOLOGY		English	Review	Mycotoxins; Environment; Emergent; Climate; Susceptible populations; Economic impact	AFLATOXIN-DNA ADDUCTS; NEURAL-TUBE DEFECTS; REPUBLIC-OF-CHINA; ASPERGILLUS-FLAVUS; FUMONISIN B-1; OCHRATOXIN-A; OXIDATIVE STRESS; CLIMATE-CHANGE; DEOXYNIVALENOL CONTAMINATION; HEPATOCELLULAR-CARCINOMA	Mycotoxins are toxic metabolites produced by fungal species that commonly contaminate staple foods and feeds. They represent an unavoidable problem due to their presence in globally consumed cereals such as rice, maize and wheat. Most mycotoxins are immunosuppressive agents and some are carcinogens, hepatotoxins, nephrotoxins, and neurotoxins. Worldwide trends envision a stricter control of mycot…	[Marroquin-Cardona, A. G.] Univ Autanoma Nuevo Leon, Fac Med Vet & Zootecnia, Escobedo 66050, Nuevo Leon, Mexico; [Johnson, N. M.] Texas A&M Univ, Sch Rural Publ Hlth, College Stn, TX 77843 USA; [Phillips, T. D.] Texas A&M Univ, Vet Integrat Biosci Dept, College Stn, TX 77843 USA; [Hayes, A. W.] Harvard Univ, Sch Publ Hlth, Dept Environm Hlth, Boston, MA 02115 USA	Texas A&M University System; Texas A&M University College Station; Texas A&M Health Science Center; Texas A&M University System; Texas A&M University College Station; Harvard University; Harvard T.H. Chan School of Public Health	Marroquin-Cardona, AG (通讯作者)，Univ Autanoma Nuevo Leon, Fac Med Vet & Zootecnia, Escobedo 66050, Nuevo Leon, Mexico.	alicia.marroquincr@uanl.edu.mx; natalie.johnson@srph.tamhsc.edu; tphillips@cvm.tamu.edu; awallacehayes@comcast.net	Marroquin-Cardona, Alicia/H-1481-2019	Marroquin-Cardona, Alicia/0000-0002-3973-7128	CONACYT (Mexico) through the National System of Researchers	CONACYT (Mexico) through the National System of Researchers	We like to thank Nicole Mitchell and Charlie Villamaria for their help in the preparation of the manuscript. A.G. Marroquin-Cardona thanks CONACYT (Mexico) for financial support through the National System of Researchers.	135	211	220	12	305	PERGAMON-ELSEVIER SCIENCE LTD	OXFORD	THE BOULEVARD, LANGFORD LANE, KIDLINGTON, OXFORD OX5 1GB, ENGLAND	0278-6915	1873-6351		FOOD CHEM TOXICOL	Food Chem. Toxicol.	JUL	2014	69					220	230		10.1016/j.fct.2014.04.025	http://dx.doi.org/10.1016/j.fct.2014.04.025		11	Food Science & Technology; Toxicology
J	Zhou, YL; Wang, YS; Tischfield, M; Williams, J; Smallwood, PM; Rattner, A; Taketo, MM; Nathans, J		Zhou, Yulian; Wang, Yanshu; Tischfield, Max; Williams, John; Smallwood, Philip M.; Rattner, Amir; Taketo, Makoto M.; Nathans, Jeremy		Canonical WNT signaling components in vascular development and barrier formation	JOURNAL OF CLINICAL INVESTIGATION		English	Article		FAMILIAL EXUDATIVE VITREORETINOPATHY; WNT/BETA-CATENIN; FRIZZLED 4; PHENOTYPIC HETEROGENEITY; LRP5; NORRIN; DISRUPTION; MICE; INACTIVATION; MAINTENANCE	Canonical WNT signaling is required for proper vascularization of the CNS during embryonic development. Here, we used mice with targeted mutations in genes encoding canonical WNT pathway members to evaluate the exact contribution of these components in CNS vascular development and in specification of the blood-brain barrier (BBB) and blood-retina barrier (BRB). We determined that vasculature in v…	[Zhou, Yulian; Wang, Yanshu; Tischfield, Max; Williams, John; Smallwood, Philip M.; Rattner, Amir; Nathans, Jeremy] Johns Hopkins Univ, Sch Med, Dept Mol Biol & Genet, Baltimore, MD 21205 USA; [Wang, Yanshu; Williams, John; Smallwood, Philip M.; Nathans, Jeremy] Johns Hopkins Univ, Sch Med, Howard Hughes Med Inst, Baltimore, MD 21205 USA; [Taketo, Makoto M.] Kyoto Univ, Grad Sch Med, Dept Pharmac…	Johns Hopkins University; Howard Hughes Medical Institute; Johns Hopkins University; Kyoto University; Johns Hopkins University; Johns Hopkins University	Nathans, J (通讯作者)，Johns Hopkins Univ, Sch Med, 805 PCTB,725 North Wolfe St, Baltimore, MD 21205 USA.	jnathans@jhmi.edu		Rattner, Amir/0000-0001-9542-6212; Nathans, Jeremy/0000-0001-8106-5460	Howard Hughes Medical Institute; National Eye Institute [EY018637, F32EY0222274]; Ellison Medical Research Foundation; NIH National Research Service Award	Howard Hughes Medical Institute(Howard Hughes Medical Institute); National Eye Institute(United States Department of Health & Human ServicesNational Institutes of Health (NIH) - USANIH National Eye Institute (NEI)); Ellison Medical Research Foundation(Lawrence Ellison Foundation); NIH National Research Service Award(United States Department of Health & Human ServicesNational Institutes of Health …	The authors thank the following colleagues for sharing reagents: Melinda Angus-Hill (Tcf4<SUP>CKO</SUP> mice), Konrad Basler (Ctnnb1<SUP>dm</SUP> mice), Richard Behringer (Ctnnb1<SUP>flex3</SUP> mice), Greg Lemke (dnTcf4 plasmid), Bart Williams (Lrp6<SUP>CKO</SUP> mice), and Michael Reth (MerCreMer plasmid). Zheng Kuang provided invaluable input on the analysis of RNAseq data. The authors thank H…	69	206	212	2	28	AMER SOC CLINICAL INVESTIGATION INC	ANN ARBOR	2015 MANCHESTER RD, ANN ARBOR, MI 48104 USA	0021-9738	1558-8238		J CLIN INVEST	J. Clin. Invest.	SEP	2014	124	9				3825	3846		10.1172/JCI76431	http://dx.doi.org/10.1172/JCI76431		22	Medicine, Research & Experimental
J	Zash, R; Holmes, L; Diseko, M; Jacobson, DL; Brummel, S; Mayondi, G; Isaacson, A; Davey, S; Mabuta, J; Mmalane, M; Gaolathe, T; Essex, M; Lockman, S; Makhema, J; Shapiro, RL		Zash, Rebecca; Holmes, Lewis; Diseko, Modiegi; Jacobson, Denise L.; Brummel, Sean; Mayondi, Gloria; Isaacson, Arielle; Davey, Sonya; Mabuta, Judith; Mmalane, Mompati; Gaolathe, Tendani; Essex, M.; Lockman, Shahin; Makhema, Joseph; Shapiro, Roger L.		Neural-Tube Defects and Antiretroviral Treatment Regimens in Botswana	NEW ENGLAND JOURNAL OF MEDICINE		English	Article		INTERVAL ESTIMATION; WOMEN; BIAS; INTERGROWTH-21ST; DOLUTEGRAVIR; PREVALENCE; PREGNANCY; EFAVIRENZ; EXPOSURE; WEIGHT	In the context of increasing treatment for HIV infection in Botswana, an association between dolutegravir use and neural-tube defects was identified. Background A preliminary safety signal for neural-tube defects was previously reported in association with dolutegravir exposure from the time of conception, which has affected choices of antiretroviral treatment (ART) for human immunodeficiency vir…	[Zash, Rebecca; Shapiro, Roger L.] Beth Israel Deaconess Med Ctr, Div Infect Dis, Boston, MA 02215 USA; [Zash, Rebecca; Essex, M.; Lockman, Shahin; Makhema, Joseph; Shapiro, Roger L.] Dept Immunol & Infect Dis, Boston, MA USA; [Jacobson, Denise L.; Brummel, Sean] Ctr Biostat AIDS Res, Boston, MA USA; [Holmes, Lewis] Massachusetts Gen Hosp, Harvard TH Chan Sch Publ Hlth, MassGen Hosp Children, Bos…	Harvard University; Beth Israel Deaconess Medical Center; Harvard University; Harvard T.H. Chan School of Public Health; Massachusetts General Hospital; Harvard University; Brigham & Women's Hospital; Botswana-Harvard AIDS Institute Partnership; University of Botswana; University of Pennsylvania; Pennsylvania Medicine	Zash, R (通讯作者)，Beth Israel Deaconess Med Ctr, Div Infect Dis, LMOB, Suite GB,110 Francis St, Boston, MA 02215 USA.	rzash@bidmc.harvard.edu	Ramogola-Masire, Doreen/AAP-2754-2020	Ramogola-Masire, Doreen/0000-0001-9624-8366; Isaacson, Arielle/0000-0003-1743-4342; Zash, Rebecca/0000-0001-5707-421X	Eunice Kennedy Shriver National Institute of Child Health and Human Development (NICHD), National Institutes of Health [R01 HD080471, R01 HD095766, K23 HD088230]	Eunice Kennedy Shriver National Institute of Child Health and Human Development (NICHD), National Institutes of Health(United States Department of Health & Human ServicesNational Institutes of Health (NIH) - USANIH Eunice Kennedy Shriver National Institute of Child Health & Human Development (NICHD))	Supported by grants from the Eunice Kennedy Shriver National Institute of Child Health and Human Development (NICHD), National Institutes of Health (R01 HD080471 and R01 HD095766, to Dr. Shapiro; and K23 HD088230, to Dr. Zash).	49	201	204	3	18	MASSACHUSETTS MEDICAL SOC	WALTHAM	WALTHAM WOODS CENTER, 860 WINTER ST,, WALTHAM, MA 02451-1413 USA	0028-4793	1533-4406		NEW ENGL J MED	N. Engl. J. Med.	AUG 29	2019	381	9				827	840		10.1056/NEJMoa1905230	http://dx.doi.org/10.1056/NEJMoa1905230		14	Medicine, General & Internal
J	Gatt, JM; Burton, KLO; Williams, LM; Schofield, PR		Gatt, Justine M.; Burton, Karen L. O.; Williams, Leanne M.; Schofield, Peter R.		Specific and common genes implicated across major mental disorders: A review of meta-analysis studies	JOURNAL OF PSYCHIATRIC RESEARCH		English	Review	Meta-analysis; Review; Pleiotrophy; Genotype; Mental illness; TWIN-E; GWAS	DEFICIT HYPERACTIVITY DISORDER; GENOME-WIDE ASSOCIATION; METHYLENETETRAHYDROFOLATE REDUCTASE GENE; SEROTONIN TRANSPORTER GENE; ONE-CARBON METABOLISM; O-METHYLTRANSFERASE COMT; NEURAL-TUBE DEFECTS; ATTENTION-DEFICIT/HYPERACTIVITY DISORDER; OBSESSIVE-COMPULSIVE DISORDER; BDNF VAL66MET POLYMORPHISM	Major efforts have been directed at family-based association and case control studies to identify the involvement of candidate genes in the major disorders of mental health. What remains unknown is whether candidate genes are associated with multiple disorders via pleiotropic mechanisms, and/or if other genes are specific to susceptibility for individual disorders. Here we undertook a review of g…	[Gatt, Justine M.; Burton, Karen L. O.; Williams, Leanne M.] Univ Sydney, Sydney Med Sch, Discipline Psychiat, Brain Dynam Ctr, Sydney, NSW 2006, Australia; [Gatt, Justine M.; Burton, Karen L. O.] Westmead Millennium Inst, Westmead, NSW 2145, Australia; [Gatt, Justine M.; Burton, Karen L. O.; Schofield, Peter R.] Neurosci Res Australia, Randwick, NSW 2031, Australia; [Gatt, Justine M.] Univ New S…	University of Sydney; University of Sydney; Westmead Institute for Medical Research; Neuroscience Research Australia; University of New South Wales Sydney; University of New South Wales Sydney; Stanford University	Gatt, JM (通讯作者)，Neurosci Res Australia, Barker St, Sydney, NSW 2031, Australia.	j.gatt@neura.edu.au	Schofield, Peter R/C-9669-2011; Williams, Leanne M/B-4095-2012; Oakley, Karen Louise/IAQ-9464-2023; Gatt, Justine M/C-4624-2008; Williams, Leanne/GLU-4975-2022	Schofield, Peter R/0000-0003-2967-9662; Oakley, Karen Louise/0000-0001-7658-5664; Gatt, Justine M/0000-0002-9276-6358; Williams, Leanne/0000-0001-9987-7360	Australian Research Council (ARC) [LP0883621]; Brain Resource Ltd [LP0883621]; NHMRC [APP1062495]; Australian National Health and Medical Research Council (NHMRC) Program [1037196]; Australian Research Council [LP0883621] Funding Source: Australian Research Council	Australian Research Council (ARC)(Australian Research Council); Brain Resource Ltd; NHMRC(National Health and Medical Research Council (NHMRC) of Australia); Australian National Health and Medical Research Council (NHMRC) Program(National Health and Medical Research Council (NHMRC) of Australia); Australian Research Council(Australian Research Council)	This project was supported by an Australian Research Council (ARC)-Linkage Grant (LP0883621), with Brain Resource Ltd (LP0883621) as industry partner. JMG is currently supported by a NHMRC Career Development Fellowship (APP1062495). Peter R Schofield is supported by an Australian National Health and Medical Research Council (NHMRC) Program Grant 1037196. JMG, LMW and PRS were investigators on the…	152	196	201	6	180	PERGAMON-ELSEVIER SCIENCE LTD	OXFORD	THE BOULEVARD, LANGFORD LANE, KIDLINGTON, OXFORD OX5 1GB, ENGLAND	0022-3956	1879-1379		J PSYCHIATR RES	J. Psychiatr. Res.	JAN	2015	60					1	13		10.1016/j.jpsychires.2014.09.014	http://dx.doi.org/10.1016/j.jpsychires.2014.09.014		13	Psychiatry
J	Reynolds, MR; Jones, AM; Petersen, EE; Lee, EH; Rice, ME; Bingham, A; Ellington, SR; Evert, N; Reagan-Steiner, S; Oduyebo, T; Brown, CM; Martin, S; Ahmad, N; Bhatnagar, J; Macdonald, J; Gould, C; Fine, AD; Polen, KD; Lake-Burger, H; Hillard, CL; Hall, N; Yazdy, MM; Slaughter, K; Sommer, JN; Adamski, A; Raycraft, M; Fleck-Derderian, S; Gupta, J; Newsome, K; Baez-Santiago, M; Slavinski, S; White, J…		Reynolds, Megan R.; Jones, Abbey M.; Petersen, Emily E.; Lee, Ellen H.; Rice, Marion E.; Bingham, Andrea; Ellington, Sascha R.; Evert, Nicole; Reagan-Steiner, Sarah; Oduyebo, Titilope; Brown, Catherine M.; Martin, Stacey; Ahmad, Nina; Bhatnagar, Julu; Macdonald, Jennifer; Gould, Carolyn; Fine, Anne D.; Polen, Kara D.; Lake-Burger, Heather; Hillard, Christina L.; Hall, Noemi; Yazdy, Mahsa M.; Slau…	US Zika Pregnancy Registry	Vital Signs: Update on Zika Virus-Associated Birth Defects and Evaluation of All US Infants with Congenital Zika Virus Exposure - US Zika Pregnancy Registry, 2016	MMWR-MORBIDITY AND MORTALITY WEEKLY REPORT		English	Article		INTERIM GUIDANCE; UNITED-STATES; INFECTION; WOMEN	Background: In collaboration with state, tribal, local, and territorial health departments, CDC established the U.S. Zika Pregnancy Registry (USZPR) in early 2016 to monitor pregnant women with laboratory evidence of possible recent Zika virus infection and their infants. Methods: This report includes an analysis of completed pregnancies (which include live births and pregnancy losses, regardless…	[Reynolds, Megan R.; Jones, Abbey M.; Rice, Marion E.; Polen, Kara D.; Hillard, Christina L.; Slaughter, Karnesha; Adamski, Alys; Newsome, Kimberly; Baez-Santiago, Madelyn; Moore, Cynthia A.; Honein, Margaret A.] CDC, Div Congenital & Dev Disorders, Natl Ctr Birth Defects & Dev Disabil, Atlanta, GA 30333 USA; [Petersen, Emily E.; Ellington, Sascha R.; Oduyebo, Titilope; Shapiro-Mendoza, Carrie K.…	Centers for Disease Control & Prevention - USA; Centers for Disease Control & Prevention - USA; New York City Department of Health & Mental Hygiene; Oak Ridge Associated Universities; United States Department of Energy (DOE); Oak Ridge Institute for Science & Education; Florida Department of Health; Texas Department of State Health Services; Centers for Disease Control & Prevention - USA; Massach…	Honein, MA (通讯作者)，CDC, Div Congenital & Dev Disorders, Natl Ctr Birth Defects & Dev Disabil, Atlanta, GA 30333 USA.	eocbirthdef@cdc.gov	Shapiro-Mendoza, Carrie/B-3236-2009	Shapiro-Mendoza, Carrie/0000-0002-8204-8782; Yazdy, Mahsa/0000-0002-7415-5350; Dupuis, Alan/0000-0003-0703-9250; Lamson, Daryl/0000-0002-6497-917X; Igbinosa, Irogue/0000-0002-1606-5381; Adamski, Alys/0000-0001-6493-2796; Lee, Christopher/0000-0001-7957-1524; Lee, William/0000-0003-2883-0391; Jamieson, Denise/0000-0003-2597-1201; Morrison, Andrea/0009-0006-8686-2841; Neary, Jillian/0000-0003-1166-…				12	189	189	3	256	CENTERS DISEASE CONTROL	ATLANTA	1600 CLIFTON RD, ATLANTA, GA 30333 USA	0149-2195	1545-861X		MMWR-MORBID MORTAL W	MMWR-Morb. Mortal. Wkly. Rep.	APR 7	2017	66	13				366	373		10.15585/mmwr.mm6613e1	http://dx.doi.org/10.15585/mmwr.mm6613e1		8	Public, Environmental & Occupational Health
J	Atta, CAM; Fiest, KM; Frolkis, AD; Jette, N; Pringsheim, T; St Germaine-Smith, C; Rajapakse, T; Kaplan, GG; Metcalfe, A		Atta, Callie A. M.; Fiest, Kirsten M.; Frolkis, Alexandra D.; Jette, Nathalie; Pringsheim, Tamara; St Germaine-Smith, Christine; Rajapakse, Thilinie; Kaplan, Gilaad G.; Metcalfe, Amy		Global Birth Prevalence of Spina Bifida by Folic Acid Fortification Status: A Systematic Review and Meta-Analysis	AMERICAN JOURNAL OF PUBLIC HEALTH		English	Review		NEURAL-TUBE DEFECTS; SERUM ALPHA-FETOPROTEIN; MAJOR CONGENITAL-MALFORMATIONS; TEXAS-MEXICO BORDER; PRENATAL-DIAGNOSIS; UNITED-STATES; TIME TRENDS; INFANT-MORTALITY; SOUTH-AUSTRALIA; SHANXI PROVINCE	Background. Birth defects remain a significant source of worldwide morbidity and mortality. Strong scientific evidence shows that folic acid fortification of a region's food supply leads to a decrease in spina bifida (a birth defect of the spine). Still, many countries around the world have yet to approve mandatory fortification through government legislation. Objectives. We sought to perform a s…	[Atta, Callie A. M.; Fiest, Kirsten M.; Jette, Nathalie; Pringsheim, Tamara; St Germaine-Smith, Christine] Univ Calgary, Dept Clin Neurosci, Calgary, AB T2N 1N4, Canada; [Fiest, Kirsten M.; Jette, Nathalie] Univ Calgary, Hotchkiss Brain Inst, Calgary, AB T2N 1N4, Canada; [Pringsheim, Tamara; Rajapakse, Thilinie] Univ Calgary, Dept Paediat, Calgary, AB T2N 1N4, Canada; [Fiest, Kirsten M.; Frolkis,…	University of Calgary; University of Calgary; University of Calgary; University of Calgary; University of Calgary	Metcalfe, A (通讯作者)，Dept Obstet & Gynecol, Foothills Med Ctr, 1403 29 St NW, Calgary, AB T2N 2T9, Canada.	amy.metcalfe@albertahealthservices.ca	Kaplan, Gil/AAH-2335-2021; Fiest, Kirsten/AAV-5052-2020; Jette, Nathalie/HCH-4827-2022; Rajapakse, Thilinie/ABF-6181-2021; Pringsheim, Tamara/L-5955-2019	Kaplan, Gil/0000-0003-2719-0556; Fiest, Kirsten/0000-0002-7299-6594; Jette, Nathalie/0000-0003-1351-5866; Rajapakse, Thilinie/0000-0002-0425-7132; Pringsheim, Tamara/0000-0002-8229-8431; Smith, Christine/0000-0001-7649-4922	Public Health Agency of Canada; Alberta Innovates Health Solutions Population Health Investigator Award; Canadian Institutes of Health Research; Alberta Innovates Health Solutions Studentship	Public Health Agency of Canada; Alberta Innovates Health Solutions Population Health Investigator Award; Canadian Institutes of Health Research(Canadian Institutes of Health Research (CIHR)); Alberta Innovates Health Solutions Studentship	Funding for the study was provided by the Public Health Agency of Canada. N. Jette holds a Canada Research Chair Tier 2 in Neurologic Health Services Research and was the recipient of an Alberta Innovates Health Solutions Population Health Investigator Award during this study. A. Metcalfe was supported by a fellowship award from the Canadian Institutes of Health Research during this study. A. D. …	211	178	188	2	58	AMER PUBLIC HEALTH ASSOC INC	WASHINGTON	800 I STREET, NW, WASHINGTON, DC 20001-3710 USA	0090-0036	1541-0048		AM J PUBLIC HEALTH	Am. J. Public Health	JAN	2016	106	1				E24	E34		10.2105/AJPH.2015.302902	http://dx.doi.org/10.2105/AJPH.2015.302902		11	Public, Environmental & Occupational Health
J	Dewan, MC; Rattani, A; Mekary, R; Glancz, LJ; Yunusa, I; Baticulon, RE; Fieggen, G; Wellons, JC; Park, KB; Warf, BC		Dewan, Michael C.; Rattani, Abbas; Mekary, Rania; Glancz, Laurence J.; Yunusa, Ismaeel; Baticulon, Ronnie E.; Fieggen, Graham; Wellons, John C., III; Park, Kee B.; Warf, Benjamin C.		Global hydrocephalus epidemiology and incidence: systematic review and meta-analysis	JOURNAL OF NEUROSURGERY		English	Review	epidemiology; global; hydrocephalus; incidence; prevalence; volume; worldwide	NORMAL-PRESSURE HYDROCEPHALUS; CENTRAL-NERVOUS-SYSTEM; ENDOSCOPIC 3RD VENTRICULOSTOMY; CHOROID-PLEXUS CAUTERIZATION; NEURAL-TUBE DEFECTS; CONGENITAL HYDROCEPHALUS; INFANTILE HYDROCEPHALUS; PRENATAL-DIAGNOSIS; ADULT HYDROCEPHALUS; POSTHEMORRHAGIC HYDROCEPHALUS	OBJECTIVE Hydrocephalus is one of the most common brain disorders, yet a reliable assessment of the global burden of disease is lacking. The authors sought a reliable estimate of the prevalence and annual incidence of hydrocephalus worldwide. METHODS The authors performed a systematic literature review and meta-analysis to estimate the incidence of congenital hydrocephalus by WHO region and World…	[Dewan, Michael C.; Rattani, Abbas; Park, Kee B.; Warf, Benjamin C.] Harvard Med Sch, Dept Global Hlth & Social Med, Program Global Surg & Social Change, Global Neurosurg Initiat, Boston, MA 02115 USA; [Dewan, Michael C.; Wellons, John C., III] Vanderbilt Univ, Med Ctr, Dept Neurol Surg, Nashville, TN USA; [Rattani, Abbas] Meharry Med Coll, Sch Med, Nashville, TN 37208 USA; [Mekary, Rania; Yunusa…	Harvard University; Harvard Medical School; Vanderbilt University; Meharry Medical College; Harvard University; Brigham & Women's Hospital; Harvard Medical School; Nottingham University Hospital NHS Trust; University of Nottingham; University of the Philippines System; University of the Philippines Manila; University of Cape Town; University of Cape Town; Harvard University; Boston Children's Hos…	Dewan, MC (通讯作者)，Vanderbilt Univ, Med Ctr, Nashville, TN 37235 USA.	dewan.michael@gmail.com	Yunusa, Ismaeel/X-2390-2019; Baticulon, Ronnie/AAW-7768-2020; PARK, Kee/IRZ-1467-2023	Yunusa, Ismaeel/0000-0002-9107-8561; Baticulon, Ronnie/0000-0002-2781-1845; Mekary, Rania/0000-0003-1636-0759	Vanderbilt Medical Scholars Program	Vanderbilt Medical Scholars Program	We thank Mark G. Shrime, MD, PhD, and Blake C. Alkire, MD, MPH, for their guidance and expertise in constructing this review. We would also like to acknowledge the Vanderbilt Medical Scholars Program for providing Abbas Rattani with support on this project.	106	170	179	4	37	AMER ASSOC NEUROLOGICAL SURGEONS	ROLLING MEADOWS	5550 MEADOWBROOK DRIVE, ROLLING MEADOWS, IL 60008 USA	0022-3085	1933-0693		J NEUROSURG	J. Neurosurg.	APR	2019	130	4				1065	1079		10.3171/2017.10.JNS17439	http://dx.doi.org/10.3171/2017.10.JNS17439		15	Clinical Neurology; Surgery
J	Mousa, A; Naqash, A; Lim, S		Mousa, Aya; Naqash, Amreen; Lim, Siew		Macronutrient and Micronutrient Intake during Pregnancy: An Overview of Recent Evidence	NUTRIENTS		English	Review	nutrition; macronutrients; micronutrients; pregnancy; reproduction; maternal health; neonatal outcomes	RANDOMIZED CONTROLLED-TRIAL; PRENATAL ALCOHOL EXPOSURE; DIETARY FIBER INTAKE; VITAMIN-D; GLYCEMIC INDEX; BIRTH-WEIGHT; OMEGA-3 SUPPLEMENTATION; CHILD UNDERNUTRITION; ZINC SUPPLEMENTATION; PRETERM BIRTH	Nutritional status during pregnancy can have a significant impact on maternal and neonatal health outcomes. Requirements for macronutrients such as energy and protein increase during pregnancy to maintain maternal homeostasis while supporting foetal growth. Energy restriction can limit gestational weight gain in women with obesity; however, there is insufficient evidence to support energy restric…	[Mousa, Aya; Lim, Siew] Monash Univ, Sch Publ Hlth & Prevent Med, Monash Ctr Hlth Res & Implementat MCHRI, Melbourne, Vic 3168, Australia; [Naqash, Amreen] Univ Kashmir, Dept Pharmaceut Sci, Srinagar 190006, Jammu & Kashmir, India	Monash University; University of Kashmir	Mousa, A (通讯作者)，Monash Univ, Sch Publ Hlth & Prevent Med, Monash Ctr Hlth Res & Implementat MCHRI, Melbourne, Vic 3168, Australia.	aya.mousa@monash.edu; anaqash.scholar@kashmiruniversity.net; siew.lim1@monash.edu	Naqash, Amreen/B-5248-2018	Naqash, Amreen/0000-0002-0049-494X; Mousa, Aya/0000-0002-7356-4523	National Health and Medical Research Council (NHMRC) of Australia	National Health and Medical Research Council (NHMRC) of Australia(National Health and Medical Research Council (NHMRC) of Australia)	A.M. and S.L. are supported by Early Career Fellowships provided by the National Health and Medical Research Council (NHMRC) of Australia.	105	154	164	14	80	MDPI	BASEL	ST ALBAN-ANLAGE 66, CH-4052 BASEL, SWITZERLAND		2072-6643		NUTRIENTS	Nutrients	FEB	2019	11	2						443	10.3390/nu11020443	http://dx.doi.org/10.3390/nu11020443		20	Nutrition & Dietetics
J	Wiedeman, AM; Barr, SI; Green, TJ; Xu, ZM; Innis, SM; Kitts, DD		Wiedeman, Alejandra M.; Barr, Susan I.; Green, Timothy J.; Xu, Zhaoming; Innis, Sheila M.; Kitts, David D.		Dietary Choline Intake: Current State of Knowledge Across the Life Cycle	NUTRIENTS		English	Review	choline; dietary choline forms; human milk; breast milk; dietary recommendations; adequate intake; dietary assessment	FOOD-FREQUENCY QUESTIONNAIRE; TRIMETHYLAMINE-N-OXIDE; NONALCOHOLIC FATTY LIVER; NEURAL-TUBE DEFECTS; HUMAN BREAST-MILK; PLASMA HOMOCYSTEINE CONCENTRATIONS; PREGNANT-WOMEN; PHOSPHATIDYLCHOLINE SYNTHESIS; CARDIOVASCULAR-DISEASE; GENETIC POLYMORPHISMS	Choline, an essential dietary nutrient for humans, is required for the synthesis of the neurotransmitter, acetylcholine, the methyl group donor, betaine, and phospholipids; and therefore, choline is involved in a broad range of critical physiological functions across all stages of the life cycle. The current dietary recommendations for choline have been established as Adequate Intakes (AIs) for t…	[Wiedeman, Alejandra M.; Green, Timothy J.; Innis, Sheila M.] BC Childrens Hosp, Res Inst, Vancouver, BC V5Z 4H4, Canada; [Wiedeman, Alejandra M.; Barr, Susan I.; Green, Timothy J.; Xu, Zhaoming; Kitts, David D.] Univ British Columbia, Food Nutr & Hlth Program, Vancouver, BC V6T 1Z4, Canada; [Green, Timothy J.] South Australia Hlth & Med Res Inst, Adelaide, SA 5000, Australia	BC Childrens Hospital; University of British Columbia; University of British Columbia	Kitts, DD (通讯作者)，Univ British Columbia, Food Nutr & Hlth Program, Vancouver, BC V6T 1Z4, Canada.	awiedeman@bcchr.ca; susan.barr@ubc.ca; tim.green@sahmri.com; zhaoming.xu@ubc.ca; david.kitts@ubc.ca	Green, Tim/AAA-8601-2019	Green, Tim/0000-0002-0667-4300; Wiedeman, Alejandra M./0000-0002-2149-2302	Doctoral Becas-Chile Scholarship through Comision Nacional de Investigacion Cientifica y Tecnologica (CONICYT) from the Government of Chile; Nutritional Research Fellowship from The University of British Columbia	Doctoral Becas-Chile Scholarship through Comision Nacional de Investigacion Cientifica y Tecnologica (CONICYT) from the Government of Chile(Comision Nacional de Investigacion Cientifica y Tecnologica (CONICYT)); Nutritional Research Fellowship from The University of British Columbia	This research received no external funding. A.M.W. received funding support through Doctoral Becas-Chile Scholarship provided through Comision Nacional de Investigacion Cientifica y Tecnologica (CONICYT) from the Government of Chile and Nutritional Research Fellowship from The University of British Columbia.	217	126	128	14	43	MDPI	BASEL	ST ALBAN-ANLAGE 66, CH-4052 BASEL, SWITZERLAND		2072-6643		NUTRIENTS	Nutrients	OCT	2018	10	10						1513	10.3390/nu10101513	http://dx.doi.org/10.3390/nu10101513		24	Nutrition & Dietetics
J	Kamle, M; Mahato, DK; Devi, S; Lee, KE; Kang, SG; Kumar, P		Kamle, Madhu; Mahato, Dipendra K.; Devi, Sheetal; Lee, Kyung Eun; Kang, Sang G.; Kumar, Pradeep		Fumonisins: Impact on Agriculture, Food, and Human Health and their Management Strategies	TOXINS		English	Review	Fumonisins; Fusarium spp; food contamination; health issues; secondary metabolites	FUSARIUM HEAD BLIGHT; BIOSYNTHETIC GENE-CLUSTER; NEURAL-TUBE DEFECTS; CORN-BASED PRODUCTS; LIQUID-CHROMATOGRAPHY; AFLATOXIN B-1; NATURAL COOCCURRENCE; ASPERGILLUS-NIGER; OCHRATOXIN-A; SPHINGOLIPID BIOSYNTHESIS	The fumonisins producing fungi, Fusarium spp., are ubiquitous in nature and contaminate several food matrices that pose detrimental health hazards on humans as well as on animals. This has necessitated profound research for the control and management of the toxins to guarantee better health of consumers. This review highlights the chemistry and biosynthesis process of the fumonisins, their occurr…	[Kamle, Madhu; Kumar, Pradeep] North Eastern Reg Inst Sci & Technol, Dept Forestry, Nirjuli 791109, Arunachal Prade, India; [Mahato, Dipendra K.] Deakin Univ, Sch Exercise & Nutr Sci, 221 Burwood Hwy, Burwood, Vic 3125, Australia; [Devi, Sheetal] SAB Miller India Ltd, Sonipat 131001, Haryana, India; [Lee, Kyung Eun; Kang, Sang G.] Yeungnam Univ, Dept Biotechnol, Mol Genet Lab, 280 Daehak Ro, Gyon…	North Eastern Regional Institute of Science & Technology (NERIST); Deakin University; Yeungnam University; Yeungnam University	Kumar, P (通讯作者)，North Eastern Reg Inst Sci & Technol, Dept Forestry, Nirjuli 791109, Arunachal Prade, India.;Kang, SG (通讯作者)，Yeungnam Univ, Dept Biotechnol, Mol Genet Lab, 280 Daehak Ro, Gyongsan 38541, Gyeongbuk, South Korea.;Kang, SG (通讯作者)，Yeungnam Univ, Ind Technol Inst 302, Stemforce, Gyongsan 38541, Gyeongbuk, South Korea.	madhu.kamle18@gmail.com; kumar.dipendra2@gmail.com; sheetaldeshwal1993@gmail.com; keun126@ynu.ac.kr; kangsg@yu.ac.kr; pkbiotech@gmail.com	Kumar, Pradeep/GQV-5790-2022	Mahato, Dipendra Kumar/0000-0001-8857-2326; Kumar, Pradeep/0000-0002-0892-5425	Republic of Korea	Republic of Korea	This work was supported by the Sunforce Inc. Republic of Korea.	249	114	119	7	67	MDPI	BASEL	ST ALBAN-ANLAGE 66, CH-4052 BASEL, SWITZERLAND	2072-6651			TOXINS	Toxins	JUN	2019	11	6							10.3390/toxins11060328	http://dx.doi.org/10.3390/toxins11060328		23	Food Science & Technology; Toxicology
J	Paladini, D; Malinger, G; Birnbaum, R; Monteagudo, A; Pilu, G; Salomon, LJ; Timor-Tritsch, IE		Paladini, D.; Malinger, G.; Birnbaum, R.; Monteagudo, A.; Pilu, G.; Salomon, L. J.; Timor-Tritsch, I. E.		ISUOG Practice Guidelines (updated): sonographic examination of the fetal central nervous system. Part 2: performance of targeted neurosonography	ULTRASOUND IN OBSTETRICS & GYNECOLOGY		English	Article		SPINA-BIFIDA; CONUS MEDULLARIS; BRAIN; DIAGNOSIS; 1ST; FETUSES; ANOMALIES; FISSURES; ANATOMY; SULCI		[Paladini, D.] Ist Giannina Gaslini, Fetal Med Unit, Genoa, Italy; [Malinger, G.; Birnbaum, R.] Tel Aviv Univ, Lis Matern Hosp, Sackler Sch Med,Tel Aviv Sourasky Med Ctr, Div Ultrasound Obstet & Gynecol, Tel Aviv, Israel; [Monteagudo, A.] Icahn Sch Med Mt Sinai, Carnegie Imaging Women Obstet Gynecol & Reprod Sc, New York, NY 10029 USA; [Pilu, G.] Univ Bologna, Dept Med & Surg Sci, Obstet Unit, Bo…	University of Genoa; IRCCS Istituto Giannina Gaslini; Tel Aviv University; Sackler Faculty of Medicine; Tel Aviv Sourasky Medical Center; Icahn School of Medicine at Mount Sinai; University of Bologna; Assistance Publique Hopitaux Paris (APHP); Hopital Universitaire Paul-Brousse - APHP; UDICE-French Research Universities; Sorbonne Universite; Hopital Universitaire Saint-Antoine - APHP; Universite…	Paladini, D (通讯作者)，Ist Giannina Gaslini, Fetal Med Unit, Genoa, Italy.		Paladini, Dario/AAB-2206-2019	Paladini, Dario/0000-0002-5102-6062; Timor-Tritsch, Ilan/0000-0001-9774-3107; Birnbaum, Roee/0000-0003-1073-6348; Malinger, Gustavo/0000-0003-0864-206X; Pilu, Gianluigi/0000-0002-3496-8066				46	59	65	0	7	WILEY	HOBOKEN	111 RIVER ST, HOBOKEN 07030-5774, NJ USA	0960-7692	1469-0705		ULTRASOUND OBST GYN	Ultrasound Obstet. Gynecol.	APR	2021	57	4				661	671		10.1002/uog.23616	http://dx.doi.org/10.1002/uog.23616	MAR 2021	11	Acoustics; Obstetrics & Gynecology; Radiology, Nuclear Medicine & Medical Imaging
J	Smith, AD; Refsum, H		Smith, A. D.; Refsum, H.		Homocysteine - from disease biomarker to disease prevention	JOURNAL OF INTERNAL MEDICINE		English	Review	B vitamins; cardiovascular disease; cognitive impairment; dementia; stroke	FOLIC-ACID SUPPLEMENTATION; NEURAL-TUBE DEFECTS; TRANSIENT ISCHEMIC ATTACK; PLASMA TOTAL HOMOCYSTEINE; B-VITAMIN THERAPY; STROKE PREVENTION; METHYLENETETRAHYDROFOLATE REDUCTASE; CARDIOVASCULAR-DISEASE; MACULAR DEGENERATION; COGNITIVE FUNCTION	We have reviewed the literature and have identified more than 100 diseases or conditions that are associated with raised concentrations of plasma total homocysteine. The commonest associations are with cardiovascular diseases and diseases of the central nervous system, but a large number of developmental and age-related conditions are also associated. Few other disease biomarkers have so many ass…	[Smith, A. D.; Refsum, H.] Univ Dept Pharmacol, Oxford, England; [Refsum, H.] Univ Oslo, Inst Basic Med Sci, Dept Nutr, Oslo, Norway	University of Oxford; University of Oslo	Smith, AD (通讯作者)，Dept Pharmacol, Mansfield Rd, Oxford OX1 3QT, England.	david.smith@pharm.ox.ac.uk	Smith, David/A-4233-2010	Smith, David/0000-0002-1095-6722				162	55	58	6	26	WILEY	HOBOKEN	111 RIVER ST, HOBOKEN 07030-5774, NJ USA	0954-6820	1365-2796		J INTERN MED	J. Intern. Med.	OCT	2021	290	4				826	854		10.1111/joim.13279	http://dx.doi.org/10.1111/joim.13279	APR 2021	29	Medicine, General & Internal
J	Kancherla, V; Botto, LD; Rowe, LA; Shlobin, NA; Caceres, A; Arynchyna-Smith, A; Zimmerman, K; Blount, J; Kibruyisfaw, Z; Ghotme, KA; Karmarkar, S; Fieggen, G; Roozen, S; Jr, GPO; Rosseau, G; Berry, RJ		Kancherla, Vijaya; Botto, Lorenzo D.; Rowe, Laura A.; Shlobin, Nathan A.; Caceres, Adrian; Arynchyna-Smith, Anastasia; Zimmerman, Kathrin; Blount, Jeffrey; Kibruyisfaw, Zewdie; Ghotme, Kemel A.; Karmarkar, Santosh; Fieggen, Graham; Roozen, Sylvia; Jr, Godfrey P. Oakley; Rosseau, Gail; Berry, Robert J.		Preventing birth defects, saving lives, and promoting health equity: an urgent call to action for universal mandatory food fortification with folic acid	LANCET GLOBAL HEALTH		English	Article		NEURAL-TUBE DEFECTS; FOLATE CONCENTRATIONS; PREVALENCE	July 20, 2021 marked the 30th anniversary of the publication of the landmark trial by the British Medical Research Council showing unequivocally that maternal intake of folic acid (vitamin B9) starting before pregnancy prevents most cases of infant spina bifida and anencephaly-two major neural tube defects that are severe, disabling, and often fatal. Mandatory food fortification with folic acid i…	[Kancherla, Vijaya; Jr, Godfrey P. Oakley; Berry, Robert J.] Emory Univ, Ctr Spina Bifida Prevent, Rollins Sch Publ Hlth, Dept Epidemiol, Atlanta, GA 30322 USA; [Botto, Lorenzo D.] Univ Utah, Sch Med, Dept Pediat, Div Med Genet, Salt Lake City, UT USA; [Rowe, Laura A.] Food Fortificat Initiat, Atlanta, GA USA; [Shlobin, Nathan A.] Northwestern Univ, Feinberg Sch Med, Dept Neurol Surg, Chicago, IL…	Emory University; Rollins School Public Health; Utah System of Higher Education; University of Utah; Northwestern University; Feinberg School of Medicine; University of Alabama System; University of Alabama Birmingham; Addis Ababa University; Universidad de La Sabana; University of Cape Town; George Washington University	Kancherla, V (通讯作者)，Emory Univ, Ctr Spina Bifida Prevent, Rollins Sch Publ Hlth, Dept Epidemiol, Atlanta, GA 30322 USA.	vijaya.kancherla@emory.edu	Caceres, Adrian/AAC-6309-2020; Fieggen, Anthony Graham/AAT-6510-2021; Ghotme, Kemel Ahmed Ghotme/AAR-6104-2020	Caceres, Adrian/0000-0003-2337-2168; Fieggen, Anthony Graham/0000-0001-6541-8377; Ghotme, Kemel Ahmed Ghotme/0000-0001-6802-4373; Roozen, Sylvia/0000-0002-0118-5882; Smith, Anastasia/0000-0002-2863-5388; Blount, Jeffrey/0000-0001-6244-4879				33	23	23	8	12	ELSEVIER SCI LTD	OXFORD	THE BOULEVARD, LANGFORD LANE, KIDLINGTON, OXFORD OX5 1GB, OXON, ENGLAND	2214-109X			LANCET GLOB HEALTH	Lancet Glob. Health	JUL	2022	10	7				E1053	E1057		10.1016/S2214-109X(22)00213-3	http://dx.doi.org/10.1016/S2214-109X(22)00213-3	JUN 2022	5	Public, Environmental & Occupational Health
[truncated: 10 more columns]
